# Supplementary material for: An exploration of the electrocatalytic activity of nickel boride nanocrystals in the oxidation of 5-HMF
Source: Royal Society of Chemistry journal article supplement (doi:10.1039/d4cy01220h), 2024-11-28
Supplement: d4cy01220h1.pdf [file d4cy01220h1.pdf]

## **An Exploration of the Electrocatalytic Activity of Nickel Boride Nanocrystals in the Oxidation of 5-HMF**

Jennifer Hong<sup>a,b</sup>, Matteo Miola<sup>a</sup>, Dominic Gerlach<sup>b</sup>, Marc C. A. Stuart<sup>c</sup>, Petra Rudolf<sup>b</sup>,  
Dulce M. Morales<sup>a</sup>, Loredana Protesescu<sup>b</sup>, Paolo P. Pescarmona<sup>a,\*</sup>

<sup>a</sup>Engineering and Technology Institute Groningen (ENTEG), University of Groningen,  
9747AG Groningen, Netherlands

<sup>b</sup>Zernike Institute for Advanced Materials, University of Groningen, 9747AG Groningen,  
Netherlands

<sup>c</sup>Groningen Biomolecular Sciences and Biotechnology Institute, University of Groningen,  
9747AG Groningen, Netherlands

### **Supporting Information**

| <b>Table of Contents</b> |                                                                                                                                                               | <b>Page</b> |
|--------------------------|---------------------------------------------------------------------------------------------------------------------------------------------------------------|-------------|
| <b>I</b>                 | Supporting table.....                                                                                                                                         | 5-7         |
| <b>Table S1</b>          | Reported literature on Ni <sub>x</sub> B-catalyzed electrooxidation of 5-HMF.....                                                                             | 5           |
| <b>Table S2</b>          | Reported literature on Ni-based catalyzed electrooxidation of 5-HMF .....                                                                                     | 5-7         |
| <b>Table S3</b>          | Carbon balance of electrochemical oxidation of 5-HMF at pH 12.9.....                                                                                          | 7           |
| <b>Table S4</b>          | Carbon balance of electrochemical oxidation of 5-HMF at pH 13.9.....                                                                                          | 7           |
| <b>II</b>                | Supporting figures.....                                                                                                                                       | 8-46        |
| <b>Figure S1</b>         | Images of the electrochemical tests setup.....                                                                                                                | 8           |
| <b>Figure S2</b>         | Cyclic voltammetry Ni <sub>3</sub> B-NCs@CP at pH 12.9 (3 times repetition).....                                                                              | 9           |
| <b>Figure S3</b>         | Cyclic voltammetry Ni <sub>3</sub> B-NCs@CP at pH 13.9 (4 times repetition).....                                                                              | 10          |
| <b>Figure S4</b>         | Transmission electron microscopy (TEM) images of Ni and Ni <sub>x</sub> B Nanocrystals .....                                                                  | 11          |
| <b>Figure S5</b>         | Scanning electron microscopy (SEM) images of Ni <sub>3</sub> B-NCs@CP (catalyst loading 0.15 mg/cm <sup>2</sup> ) .....                                       | 12          |
| <b>Figure S6</b>         | SEM images of Ni <sub>3</sub> B-NCs@CP (catalyst loading 0.75 mg/cm <sup>2</sup> ).....                                                                       | 13          |
| <b>Figure S7</b>         | Cyclic voltammetry Ni <sub>3</sub> B-NCs@CP with different catalyst loading.....                                                                              | 14          |
| <b>Figure S8</b>         | Conversion, yield, and Faradaic Efficiency (FE) of 5-HMF (100 mM) electrooxidation catalyzed by Ni <sub>3</sub> B-NCs@CP with different catalyst loading..... | 15          |
| <b>Figure S9</b>         | Double layer capacitance measurement of Ni <sub>3</sub> B-NCs@CP with different catalyst loading.....                                                         | 16          |
| <b>Figure S10</b>        | Chronoamperometry of Ni <sub>3</sub> B-NCs@CP (0.15 mg/cm <sup>2</sup> ) plotted with 5-HMF concentration profile.....                                        | 17          |
| <b>Figure S11</b>        | Chronoamperometry of Ni <sub>3</sub> B-NCs@CP (0.75 mg/cm <sup>2</sup> ) plotted with 5-HMF concentration profile.....                                        | 18          |
| <b>Figure S12</b>        | Chronoamperometry of Ni <sub>3</sub> B-NCs@CP at pH 12.9 in the                                                                                               |             |

|                   |                                                                                                                                          |    |
|-------------------|------------------------------------------------------------------------------------------------------------------------------------------|----|
|                   | presence and absence of 5-HMF.....                                                                                                       | 19 |
| <b>Figure S13</b> | Chronoamperometry of carbon paper plotted with 5-HMF concentration profile.....                                                          | 20 |
| <b>Figure S14</b> | XPS analysis of the O 1s and C 1s core level of Ni <sub>3</sub> B-NCs@CP.....                                                            | 21 |
| <b>Figure S15</b> | Cyclic voltammetry Ni <sub>3</sub> B-NCs@CP with 100 mM 5-HMF at pH 12.9 and pH 13.9.....                                                | 22 |
| <b>Figure S16</b> | Chronoamperometry Ni <sub>3</sub> B-NCs@CP with 100 mM 5-HMF at pH 12.9 and pH 13.9.....                                                 | 23 |
| <b>Figure S17</b> | Cyclic voltammetry Ni <sub>3</sub> B-NCs@CP with 100 mM 5-HMF at pH 12.9 and pH 13.9 post-chronoamperometry.....                         | 24 |
| <b>Figure S18</b> | Concentration profile 5-HMF and the possible oxidative products throughout chronoamperometry at 1.8 V vs RHE in 0.1 M KOH (pH 12.9)..... | 25 |
| <b>Figure S19</b> | Concentration profile 5-HMF and the possible oxidative products throughout chronoamperometry at 1.8 V vs RHE in 1 M KOH (pH 13.9).....   | 26 |
| <b>Figure S20</b> | Images of non-electrochemical studies with $\gamma$ -NiOOH at pH 12.9 and 13.9.....                                                      | 27 |
| <b>Figure S21</b> | HPLC of $\gamma$ -NiOOH catalyzed non-electrochemical oxidation of 5-HMF at pH 12.9.....                                                 | 28 |
| <b>Figure S22</b> | HPLC of $\gamma$ -NiOOH catalyzed non-electrochemical oxidation of 5-HMF at pH 13.9.....                                                 | 29 |
| <b>Figure S23</b> | Cyclic voltammetry Ni <sub>3</sub> B-NCs@CP with different 5-HMF concentration at pH 13.9.....                                           | 30 |
| <b>Figure S24</b> | Effect of 5-HMF concentration on current density.....                                                                                    | 31 |
| <b>Figure S25</b> | Concentration profile 5-HMF and the possible oxidative products throughout chronoamperometry at 1.5 V vs RHE in 1 M KOH (pH 13.9).....   | 32 |
| <b>Figure S26</b> | Concentration profile 5-HMF and the possible oxidative products throughout chronoamperometry at 1.6 V vs RHE in 1 M KOH (pH 13.9).....   | 33 |
| <b>Figure S27</b> | Concentration profile 5-HMF and the possible oxidative products throughout chronoamperometry at 1.7 V vs RHE in 1 M KOH (pH 13.9).....   | 34 |
| <b>Figure S28</b> | Three independent chronoamperometry measurement of Ni-NCs@CP (0.05 mg/cm <sup>2</sup> ) at pH 13.9.....                                  |    |

|                   |                                                                                                                                       |       |
|-------------------|---------------------------------------------------------------------------------------------------------------------------------------|-------|
|                   |                                                                                                                                       | 35    |
| <b>Figure S29</b> | Three independent chronoamperometry measurement of Ni <sub>3</sub> B-NCs@CP (0.05 mg/cm <sup>2</sup> ) at pH 13.9.....                | 36    |
| <b>Figure S30</b> | Three independent chronoamperometry measurement of Ni <sub>2</sub> B-NCs@CP (0.05 mg/cm <sup>2</sup> ) at pH 13.9.....                | 37    |
| <b>Figure S31</b> | HPLC of B <sub>2</sub> O <sub>3</sub> catalyzed non-electrochemical oxidation of 5-HMF at pH 12.9.....                                | 38    |
| <b>Figure S32</b> | HPLC of B <sub>2</sub> O <sub>3</sub> catalyzed non-electrochemical oxidation of 5-HMF at pH 13.9.....                                | 39    |
| <b>Figure S33</b> | Cyclic voltammetry B <sub>2</sub> O <sub>3</sub> @CP with 100 mM 5-HMF at pH 13.9.....                                                | 40    |
| <b>Figure S34</b> | Chronoamperometry of 1 <sup>st</sup> run of Ni <sub>3</sub> B-NCs@CP recycling study plotted against 5-HMF concentration profile..... | 41    |
| <b>Figure S35</b> | Chronoamperometry of 2 <sup>nd</sup> run of Ni <sub>3</sub> B-NCs@CP recycling study plotted against 5-HMF concentration profile..... | 42    |
| <b>Figure S36</b> | Chronoamperometry of 3 <sup>rd</sup> run of Ni <sub>3</sub> B-NCs@CP recycling study plotted against 5-HMF concentration profile..... | 43    |
| <b>Figure S37</b> | Chronoamperometry of 4 <sup>th</sup> run of Ni <sub>3</sub> B-NCs@CP recycling study plotted against 5-HMF concentration profile..... | 44    |
| <b>Figure S38</b> | Chronoamperometry of 5 <sup>th</sup> run of Ni <sub>3</sub> B-NCs@CP recycling study plotted against 5-HMF concentration profile..... | 45    |
| <b>Figure S39</b> | XRD pattern of Ni <sub>3</sub> B-NCs@CP as prepared and following recyclability tests.....                                            | 46    |
| <b>Figure S40</b> | XRD pattern of Ni <sub>3</sub> B-NCs@CP after 5 <sup>th</sup> run of electrochemical test analysis.....                               | 47    |
| <b>Figure S41</b> | Chronoamperometry of Ni <sub>3</sub> B-NCs@CP at pH 13.9 in the presence and absence of 5-HMF.....                                    | 48    |
| <b>References</b> |                                                                                                                                       | 49-50 |

Table S1. Reported Ni<sub>x</sub>B-based electrocatalyst studied for the electrooxidation of 5-HMF.

| Material                                         | Catalyst loading (mg/cm <sup>2</sup> ) | HMF concentration (mM) | pH   | Potential (V vs RHE) | Reaction time (h)   | HMF conversion (%) | Yield (%)                         | $n_{\text{product}}$ (mmol)                                                                 | FE (%) | TOF <sup>a</sup>   | Ref.      |
|--------------------------------------------------|----------------------------------------|------------------------|------|----------------------|---------------------|--------------------|-----------------------------------|---------------------------------------------------------------------------------------------|--------|--------------------|-----------|
| Ni <sub>3</sub> B-NCs@CP                         | 0.05                                   | 100                    | 13.9 | 1.8                  | 3                   | 70                 | FDCA ~33<br>HMFCFA~5<br>FFCA~7    | $n_{\text{FDCA}} \sim 0.33$<br>$n_{\text{HMFCFA}} \sim 0.05$<br>$n_{\text{FFCA}} \sim 0.07$ | 94-100 | 16                 | This work |
|                                                  | 0.05                                   | 100                    | 13.9 | 1.5                  | 3                   | 60                 | FDCA ~32<br>HMFCFA~8<br>FFCA~8    | $n_{\text{FDCA}} \sim 0.32$<br>$n_{\text{HMFCFA}} \sim 0.08$<br>$n_{\text{FFCA}} \sim 0.08$ | 100    | 16                 |           |
|                                                  | 0.05                                   | 100                    | 13.9 | 1.8                  | 8                   | 97                 | FDCA ~54<br>HMFCFA~4<br>FFCA~8    | $n_{\text{FDCA}} \sim 0.54$<br>$n_{\text{HMFCFA}} \sim 0.04$<br>$n_{\text{FFCA}} \sim 0.08$ | 47     | 9.1                |           |
|                                                  | 0.05                                   | 100                    | 12.9 | 1.8                  | 3                   | 37                 | FDCA ~3<br>DFF~4.5<br>FFCA~18.8   | $n_{\text{FDCA}} \sim 0.03$<br>$n_{\text{DFF}} \sim 0.045$<br>$n_{\text{FFCA}} \sim 0.188$  | 100    | 6.8                |           |
|                                                  | 0.15                                   | 100                    | 12.9 | 1.8                  | 3                   | 37                 | FDCA ~2.9<br>DFF~3.9<br>FFCA~18.5 | $n_{\text{FDCA}} \sim 0.029$<br>$n_{\text{DFF}} \sim 0.039$<br>$n_{\text{FFCA}} \sim 0.185$ | 100    | 2.2                |           |
|                                                  | 0.75                                   | 100                    | 12.9 | 1.8                  | 3                   | 39.3               | FDCA ~4.8<br>DFF~4.1<br>FFCA~16.9 | $n_{\text{FDCA}} \sim 0.048$<br>$n_{\text{DFF}} \sim 0.041$<br>$n_{\text{FFCA}} \sim 0.169$ | 100    | 0.5                |           |
|                                                  | Ni <sub>x</sub> B/NF                   | 1                      | 10   | 13.9                 | 1.45                | 50 min             | 99                                | 98.5                                                                                        | 0.0985 | ~100               |           |
| NiB <sub>x</sub> /NF                             | 2.47                                   | 10                     | 13.9 | 0.6 vs SHE           | 1h 40 min           | 99                 | 99                                | 0.396                                                                                       | 99.5   | 0.57 <sup>b</sup>  | 2         |
| NiB <sub>x</sub> -P <sub>y</sub> /CP (amorphous) | 4                                      | 10                     | 12.9 | 1.46                 | Charge passed: 35 C | 97 - 99            | FDCA ~60-80<br>FFCA ~9.8-35       |                                                                                             | 80-92  | 0.128 <sup>c</sup> | 3         |

$$\text{Turnover frequency (TOF)} = \frac{n_e(\text{FDCA}) \cdot n_{\text{FDCA}} + n_e(\text{FFCA}) \cdot n_{\text{FFCA}} + n_e(\text{HMFCFA}) \cdot n_{\text{HMFCFA}} + n_e(\text{DFF}) \cdot n_{\text{DFF}}}{m_{\text{Ni}_x\text{B}} \cdot t}$$

<sup>a</sup> where  $n_{e(P)}$  ( $P = \text{FDCA}, \text{FFCA}, \text{HMFCFA}$  or  $\text{DFF}$ ) is the number of electrons required to oxidize 5-HMF to product  $P$  ( $n_{e(\text{FDCA})} = 6$ ,  $n_{e(\text{FFCA})} = 4$ ,  $n_{e(\text{HMFCFA})} = n_{e(\text{DFF})} = 2$ ) and  $n_P$  is the mol of compound  $P$  (mmol).  $m_{\text{Ni}_x\text{B}}$  is the mass of the Ni<sub>x</sub>B on the electrode (mg) and  $t$  is the reaction time (h).

<sup>b</sup> Assuming an electrode area of 1 cm<sup>2</sup> (the electrode area was not provided) and electrolyte volume of 40 mL (based on data on the caption in the supporting information).

<sup>c</sup> Assuming reaction time of 1 h and electrolyte volume of 10 mL (any information regarding reaction/measurement time and electrolyte volume were not provided).

Table S2. Reported Ni<sub>x</sub>B-based electrocatalyst studied for the electrooxidation of 5-HMF.

| Material                                                | Catalyst loading (mg/cm <sup>2</sup> ) | HMF concentration (mM) | pH   | Potential (V vs RHE)                      | Reaction time (h)   | HMF conversion (%) | Yield (%)              | FE (%)  | Reference |
|---------------------------------------------------------|----------------------------------------|------------------------|------|-------------------------------------------|---------------------|--------------------|------------------------|---------|-----------|
| NiFe@NF                                                 | N/A                                    | 50-100                 | 13.9 | 1.478                                     | 0.2                 | 99                 | FDCA ~92%              | 92      | 4         |
| NiO/Ni(OH) <sub>2</sub>                                 | N/A                                    | 5                      | 13.9 | Chronopotentiometry 16 mA/cm <sup>2</sup> | 4                   | N/A                | FDCA 71%               | 84      | 5         |
| Ni <sub>3</sub> S <sub>2</sub> /NF                      | N/A                                    | 10                     | 13.9 | 1.423                                     | Charge passed 58 C  | 100                | FDCA ~98               | 98      | 6         |
| Ni <sub>2</sub> P NPA/NF                                | N/A                                    | 10                     | 13.9 | 1.423                                     | 2.5                 | 100                | FDCA selectivity ~100  | 98      | 7         |
| Hp-Ni                                                   | 75                                     | 10                     | 13.9 | 1.423                                     | Charge passed 58 C  | 100                | FDCA ~95               | 98      | 8         |
| NiP-Al <sub>2</sub> O <sub>3</sub> /NF                  | 1.2                                    | 10                     | 13.9 | 1.45                                      | 3.5                 | 98.2               | FDCA selectivity ~99.6 | N/A     | 9         |
| Branched Ni NPs                                         | 0.35                                   | N/A                    | 12.9 | 1.43                                      | N/A                 | N/A                | N/A                    | N/A     | 10        |
| Ni <sub>3</sub> N@C                                     | N/A                                    | 10                     | 13.9 | 1.45                                      | Charge passed 174   | 100                | 98                     | 99      | 11        |
| NiO-Co <sub>3</sub> O <sub>4</sub>                      | N/A                                    | 10                     | 13.9 | 1.45                                      | 0.5                 | 100                | 98.5                   | 100     | 12        |
| h-Ni(OH) <sub>2</sub>                                   | 0.625                                  | 10                     | 13.9 | Chronopotentiometry 20 mA/cm <sup>2</sup> | 3.3                 | 98.8               | FDCA selectivity ~98.5 | 94.9    | 13        |
| t-NiCo-MOF                                              | 1.05-1.55                              | 10                     | 13.9 | N/A                                       | Charge passed 58    | 100                | FDCA ~100              | 98      | 14        |
| NiSe@NiO <sub>x</sub> /NF                               | 2.1                                    | 10                     | 13.9 | 1.423                                     | 2                   | 100                | FDCA ~99               | 99      | 15        |
| NiO NPs                                                 | N/A                                    | 10                     | 7.23 | 1.5-1.7                                   | Charge passed 29    | 90                 | FDCA ~30               | 70      | 16        |
| Au-NiO                                                  | N/A                                    | 10                     | 13.9 | 0.4 V vs Ag/AgCl                          | 5                   | N/A                | N/A                    | 99      | 17        |
| NiOOH                                                   | N/A                                    | 10                     | 12.9 | 1.47                                      | 4.7                 | 99.8               | FDCA ~96               | 96      | 18        |
| NiCoBDC-NF                                              | N/A                                    | 10                     | 12.9 | 1.55                                      | 4                   | N/A                | FDCA selectivity ~99   | 78      | 19        |
| β-Co <sub>0.1</sub> Ni <sub>0.9</sub> (OH) <sub>2</sub> | N/A                                    | 10                     | 13.9 | N/A                                       | N/A                 | 100                | FDCA ~96               | ~93     | 20        |
| NiO/carbon felt                                         | 0.375                                  | 0.2 mM                 | 11   | 1.44                                      | 12                  | 100                | FDCA 98                | N/A     | 21        |
| NiFe LDH                                                | N/A                                    | 10 - 100               | 13.9 | 1.23 - 1.43                               | 0.5 - 10            | 91 - 99            | FDCA 90 - 98           | 77 - 99 | 22        |
| Ni MOF                                                  | 0.5                                    | 50                     | 13.9 | 1.5                                       | Charge passed ~58 C | 100                | FDCA ~70               | 98      | 23        |
| Ni(NS)/CP                                               | N/A                                    | 5                      | 13.9 | 1.33                                      | 1                   | 99.7               | FDCA~99.4              | N/A     | 24        |
| NiCoFe LDHs                                             | 0.532                                  | 10                     | 13.9 | 1.54                                      | 1                   | 95.5               | FDCA ~84.9             | 90      | 25        |
| NiCo <sub>2</sub> O <sub>4</sub>                        | N/A                                    | 5                      | 13.9 | 1.5                                       | ~0.9                | 99.6               | FDCA ~90.4             | 87.5    | 26        |
| Ni <sub>x</sub> Se <sub>y</sub> /NiFeLDH@NF             | 7.2                                    | 10                     | 13.9 | 1.423                                     | > 1                 | 99.6               | FDCA ~99.3             | 98.9    | 27        |
| NiCoS                                                   | N/A                                    | 10                     | 13.9 | 1.45                                      | 0.67                | 99.1               | FDCA                   | 96.4    | 28        |

|                                                  |         |    |      |          |                        |      |                        |      |    |
|--------------------------------------------------|---------|----|------|----------|------------------------|------|------------------------|------|----|
| d-NiFe LDH                                       | N/A     | 10 | 13.9 | 1.48     | 5                      | 95.5 | ~97.1<br>FDCA<br>~96.8 | 84.5 | 29 |
| CoFe LDH@NiFe LDH                                | N/A     | 10 | 13.9 | 1.4      | > 3                    | 100  | FDCA<br>~100           | 99.8 | 30 |
| NiVCo-LDH                                        | N/A     | 10 | 13.9 | 1.376    | Charge passed<br>~58 C | 100  | FDCA<br>~99.7          | 97   | 31 |
| NiCu NTs                                         | 16.67   | 20 | 13.9 | 1.42     | 2                      | 100  | FDCA<br>~99            | 96.4 | 32 |
| RuNiO                                            | 3.2 wt% | 50 | 7    | 1.3-1.8  | Charge passed<br>~90 C | 72.4 | DFF<br>~42.5           | 43.3 | 33 |
| Mo-Ni <sub>0.85</sub> Se                         | N/A     | 10 | 13.9 | 1.4      | 2                      | 100  | FDCA<br>~99            | 99   | 34 |
| Pt-Ni(OH) <sub>2</sub>                           | 0.2     | 50 | 13.9 | N/A      | N/A                    | 100  | FDCA<br>~96            | 98.7 | 35 |
| Co-Ni <sub>3</sub> S <sub>2</sub>                | N/A     | 50 | 13.9 | 1.45     | 0.3                    | 100  | FDCA<br>~100           | 99.1 | 36 |
| Ni(OH) <sub>2</sub> -NiFeP                       | N/A     | 10 | 13.9 | 1.55     | Charge passed<br>~85 C | 100  | FDCA<br>~99            | 94   | 37 |
| Ni <sub>2</sub> P-NiCoP                          | 1.8     | 5  | 12.9 | 1.45     | Charge passed<br>~60 C | 100  | FDCA<br>~98.1          | 97.6 | 38 |
| NiS <sub>x</sub> -Ni <sub>2</sub> P              | N/A     | 10 | 13.9 | 1.46     | Charge passed<br>~90 C | 100  | 98.5                   | 95.1 | 39 |
| FeP-NiMoP <sub>2</sub>                           | N/A     | 10 | 13.9 | 1.40     | 1.8                    | 100  | FDCA<br>~99.2          | 99   | 40 |
| MoS <sub>2</sub> -Ni <sub>3</sub> S <sub>2</sub> | N/A     | 50 | 13.9 | 1.35-1.7 | 2.6-8                  | N/A  | FDCA<br>~95            | 95   | 41 |

Table S3. Carbon balance of 5-HMF oxidation in 0.1 M KOH (pH 12.9) after 3 h of chronoamperometry at 1.8 V vs RHE

| Electrode                | Carbon balance (%) |
|--------------------------|--------------------|
| Ni-NCs@CP                | 91                 |
| Ni <sub>3</sub> B-NCs@CP | 95                 |
| Ni <sub>2</sub> B-NCs@CP | 95                 |

Table S4. Carbon balance of 5-HMF oxidation in 1.0 M KOH (pH 13.9) after 3 h of chronoamperometry at 1.8 V vs RHE

| Electrode                | Carbon balance (%) |
|--------------------------|--------------------|
| Ni-NCs@CP                | 66                 |
| Ni <sub>3</sub> B-NCs@CP | 73                 |
|                          | 58 <sup>a</sup>    |
| Ni <sub>2</sub> B-NCs@CP | 75                 |

<sup>a</sup> Carbon balance of electrochemical oxidation of 5-HMF with Ni<sub>3</sub>B-NCs@CP at 1.8 V vs RHE for 8 h.

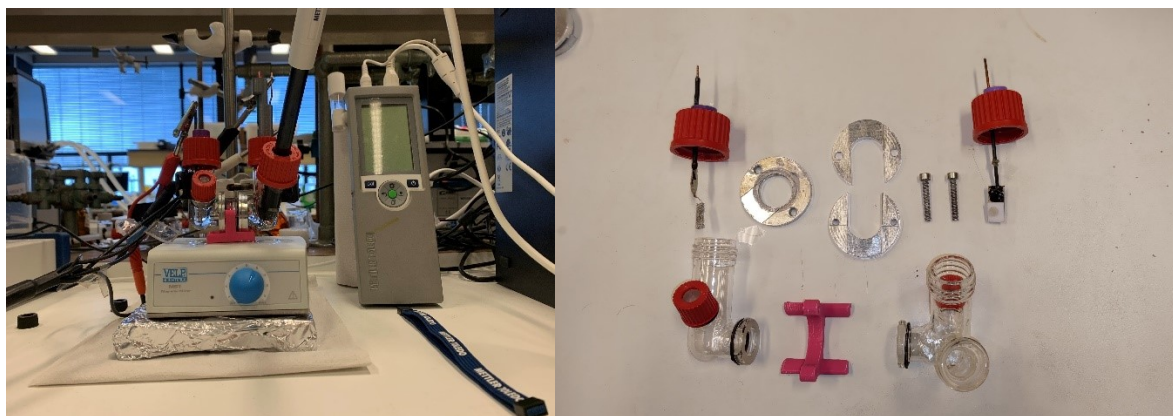

Figure S1. Images of two compartment H-type cell with a three-electrode configuration equipped with pH meter.



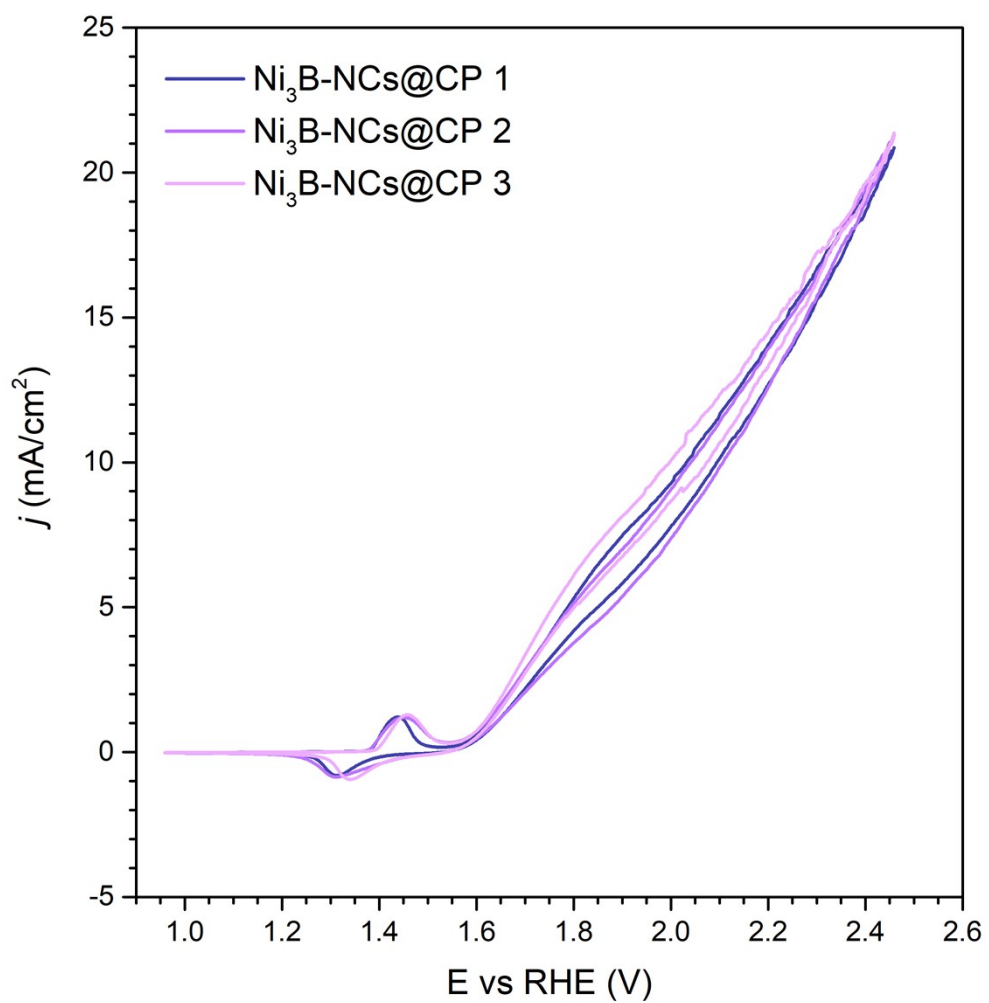

Figure S2. Reproducibility test of the Ni<sub>3</sub>B-NCs@CP (Ni<sub>3</sub>B NC loading 0.05 mg/cm<sup>2</sup>) cyclic voltammetry at 10 mV/s in 0.1 M KOH (pH 12.9).

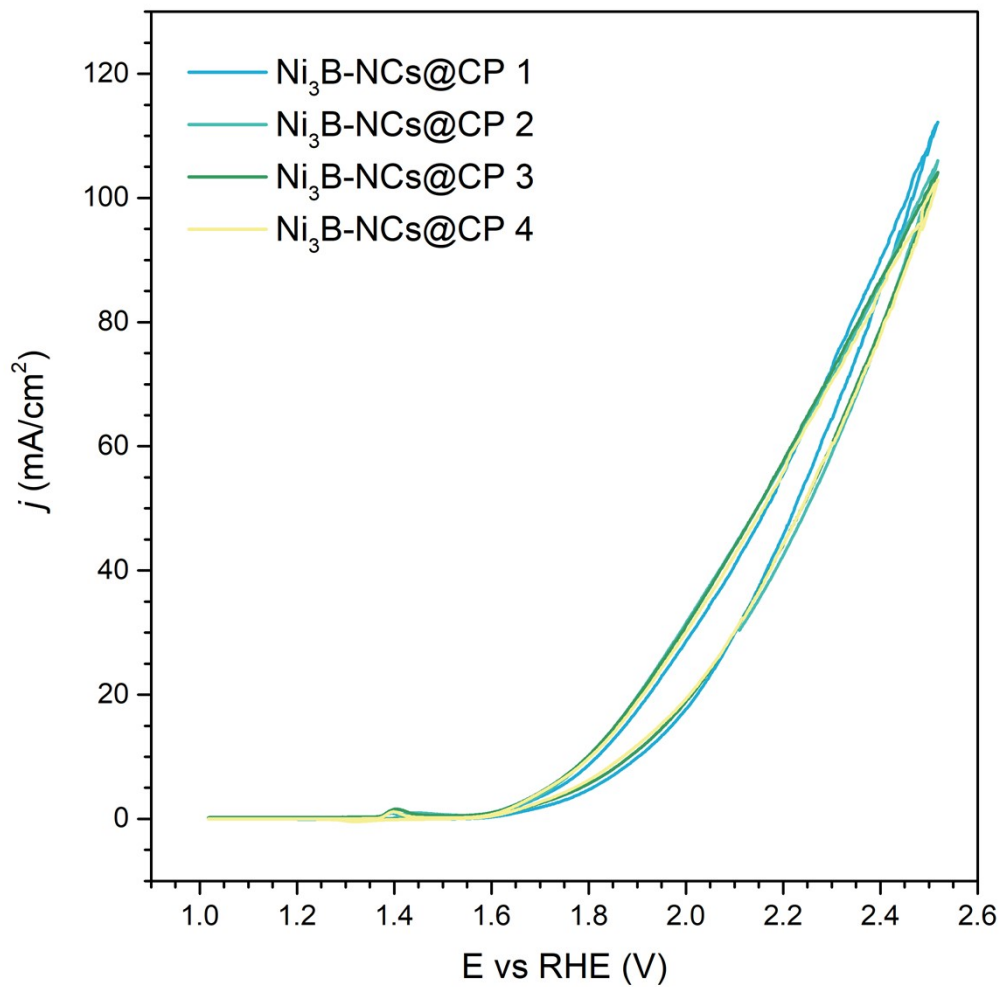

Figure S3. Reproducibility test of the Ni<sub>3</sub>B-NCs@CP (Ni<sub>3</sub>B NC loading 0.05 mg/cm<sup>2</sup>) cyclic voltammetry at 10 mV/s in 1 M KOH (pH 13.9)

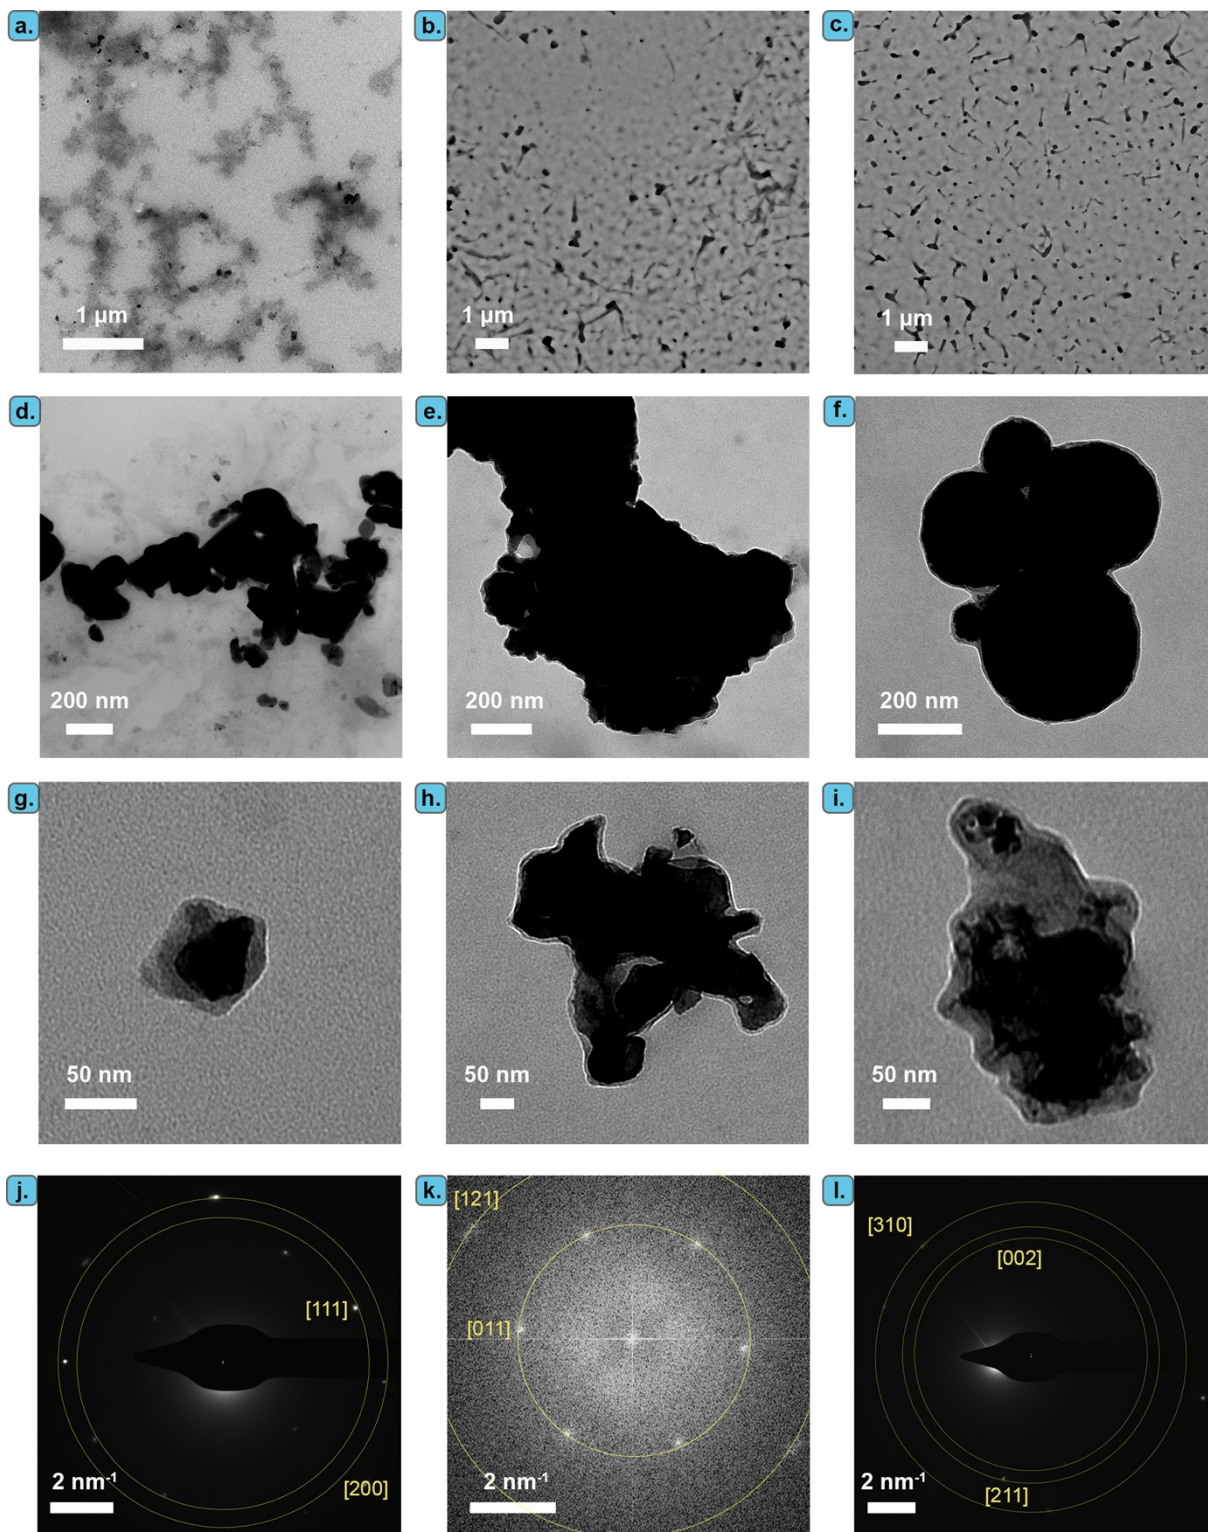

Figure S4. TEM images of (a, d, g) Ni NCs mixed with Nafion, (b, e, h) Ni<sub>3</sub>B NCs mixed with Nafion, and (c, f, i) Ni<sub>2</sub>B NCs mixed with Nafion. Selected area electron diffraction (SAED) of (j) Ni NCs mixed with Nafion, in which [111] corresponds to the peak at  $2\theta = 45^\circ$  and [200] corresponds to the peak at  $2\theta = 52^\circ$  in the XRD pattern in Fig. 2a; (k) Fast Fourier Transform (FFT) of Ni<sub>3</sub>B NCs mixed with Nafion, in which [011] corresponds to the peak at  $2\theta = 24^\circ$  and [121] corresponds to the peak at  $2\theta = 38^\circ$  in the XRD pattern in Fig. 2b; (l) SAED of Ni<sub>2</sub>B NCs mixed with Nafion, in which [002] corresponds to the peak at  $2\theta = 42^\circ$ , [211] corresponds to the

peak at  $2\theta = 46^\circ$  and [310] corresponds to the peak at  $2\theta = 58^\circ$  in the XRD pattern in Fig. 2c.

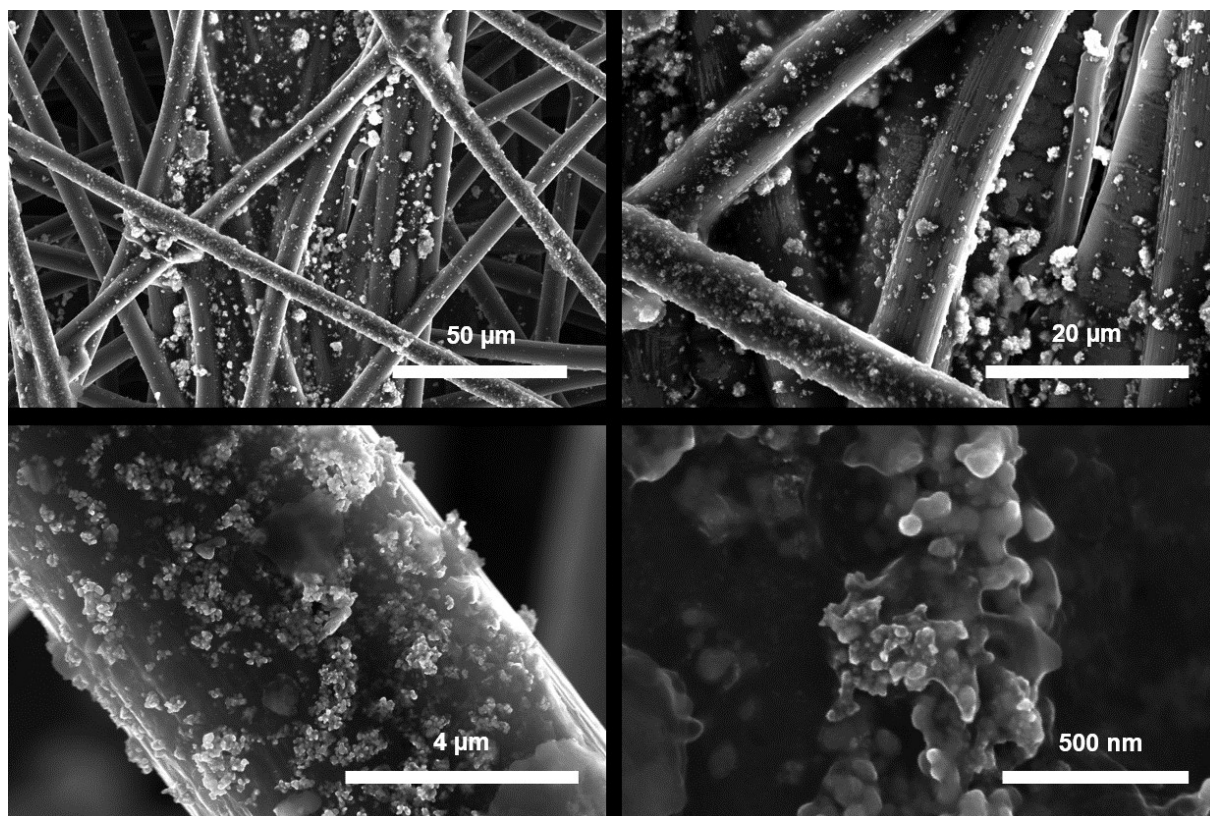

Figure S5. Scanning electron microscopy (SEM) images of Ni<sub>3</sub>B-NCs@CP with catalyst loading of 0.15 mg/cm<sup>2</sup>. Ni<sub>3</sub>B NCs (3 mg) was dispersed in 1 mL of 0.1 M Nafion/DMSO solution. The mixture was stirred overnight at 90 C then sonicated for 45 minutes. 50 μL of the ink was dropcast onto 1x1 cm<sup>2</sup> carbon paper support and dried overnight at 70 C in vacuo.

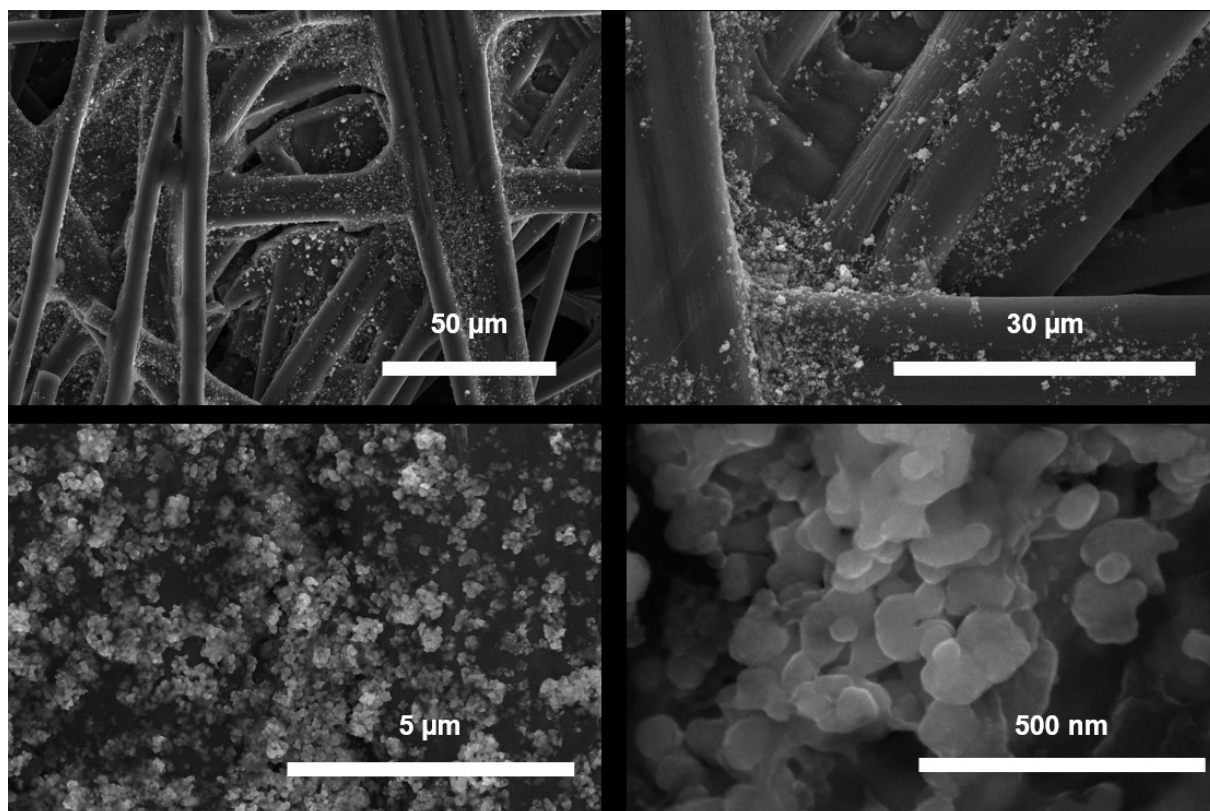

Figure S6. Scanning electron microscopy (SEM) images of Ni<sub>3</sub>B-NCs@CP with catalyst loading of 0.75 mg/cm<sup>2</sup>. Ni<sub>3</sub>B NCs (15 mg) was dispersed in 1 mL of 0.1 M Nafion/DMSO solution. The mixture was stirred overnight at 90 C then sonicated for 45 minutes. 50 μL of the ink were then dropcast onto 1x1 cm<sup>2</sup> carbon paper support and dried overnight at 70 C in vacuo.

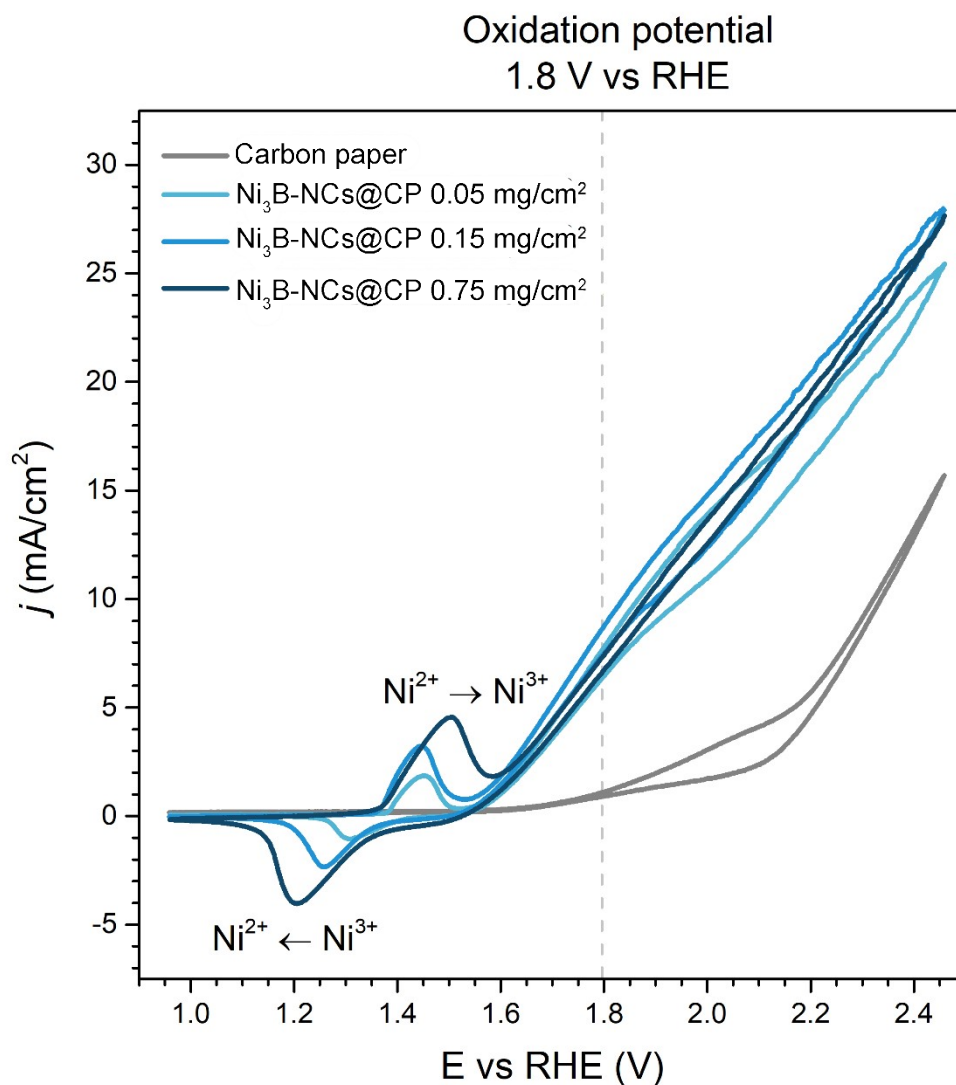

Figure S7. Cyclic voltammety recorded at 10 mV/s of Ni<sub>3</sub>B-NCs@CP with different catalyst loading in 0.1 M KOH (pH 12.9) in the absence 5-HMF.

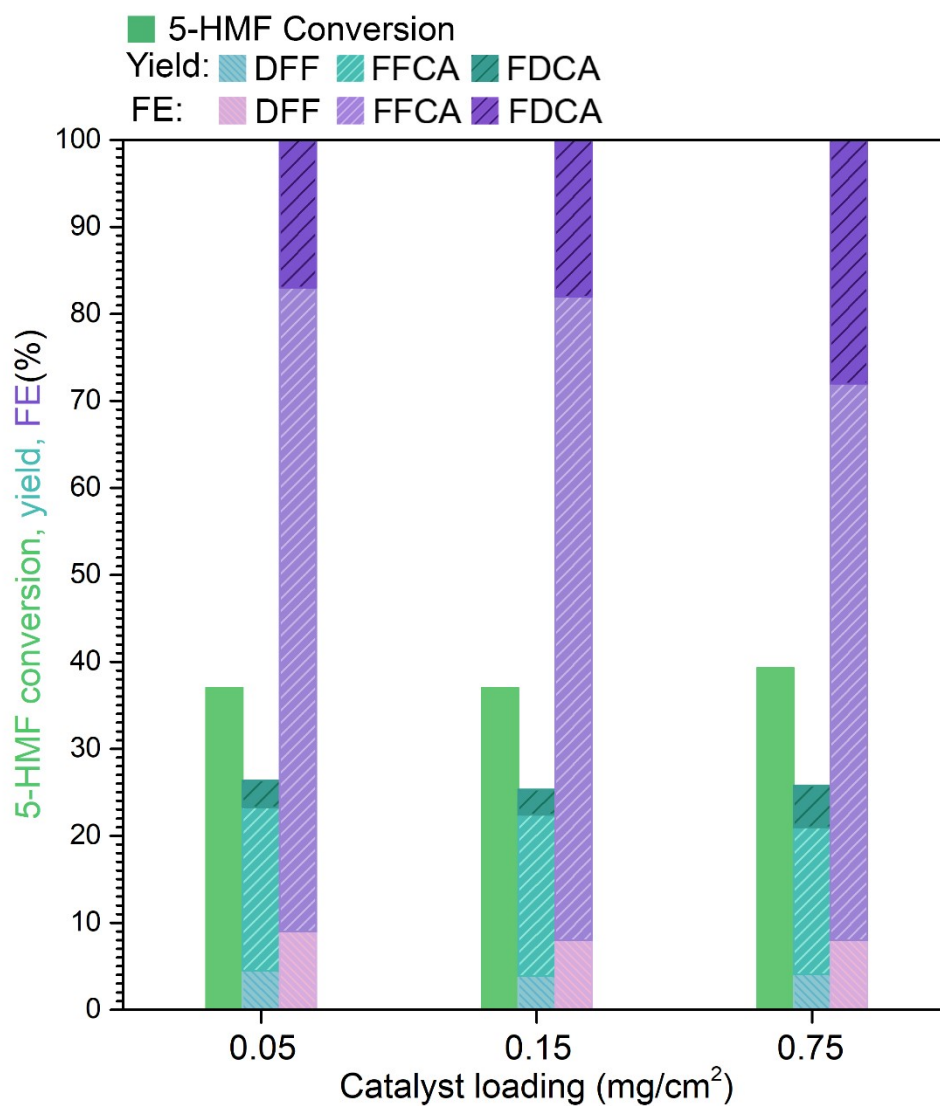

Figure S8. Conversion, yield, and Faradaic Efficiency (FE) of 5-HMF (100 mM) electrooxidation catalyzed by Ni<sub>3</sub>B-NCs@CP with different catalyst loading at a constant potential 1.8 V vs RHE in 0.1 M KOH (pH 12.9).



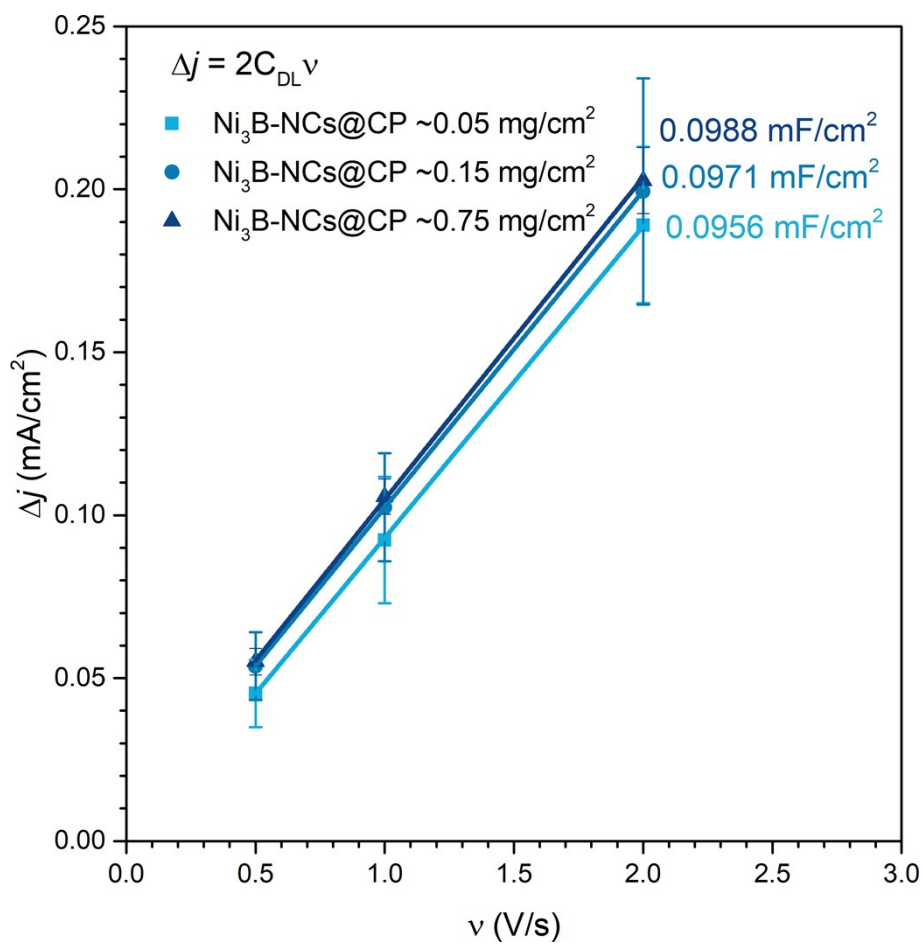

Figure S9. Difference between anodic to cathodic current density plotted against the scan rate. From the value of the slope of the plots ( $2C_{DL}$ ), the double layer capacitance ( $C_{DL}$ ) can be calculated.

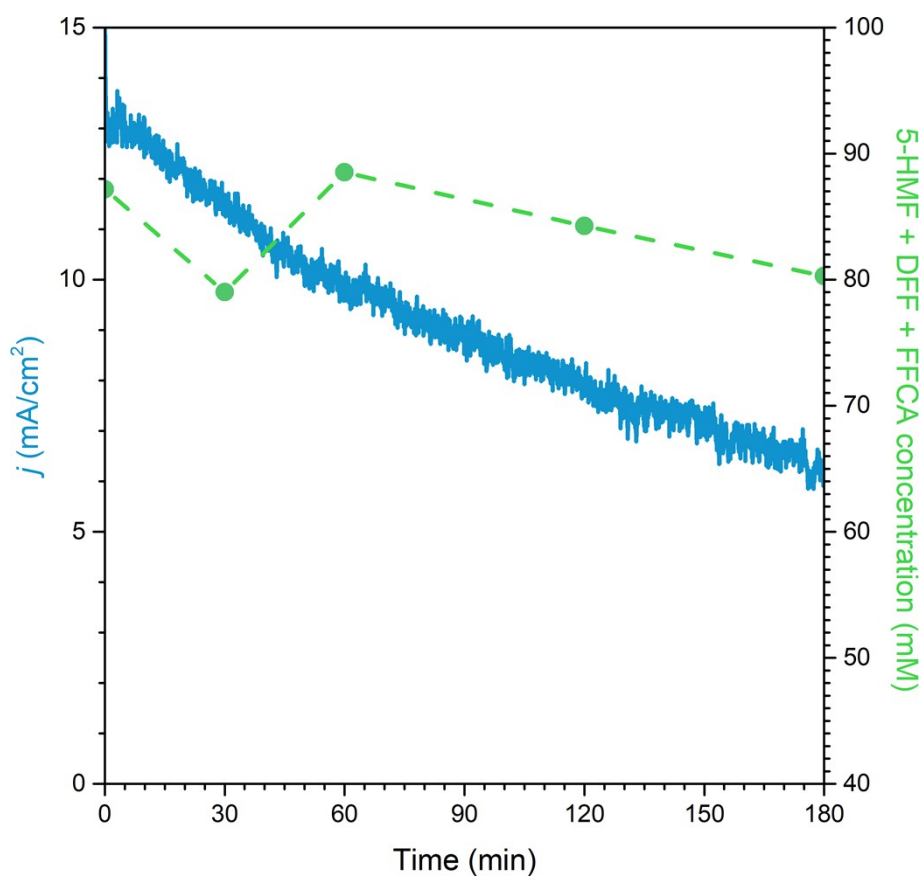

Figure S10. Current density and the sum of 5-HMF, DFF, and FFCA concentrations as function of electrolysis time obtained by chronoamperometry of Ni<sub>3</sub>B-NCs@CP with catalyst loading 0.15 mg/cm<sup>2</sup> in 0.1 M KOH (pH 12.9).

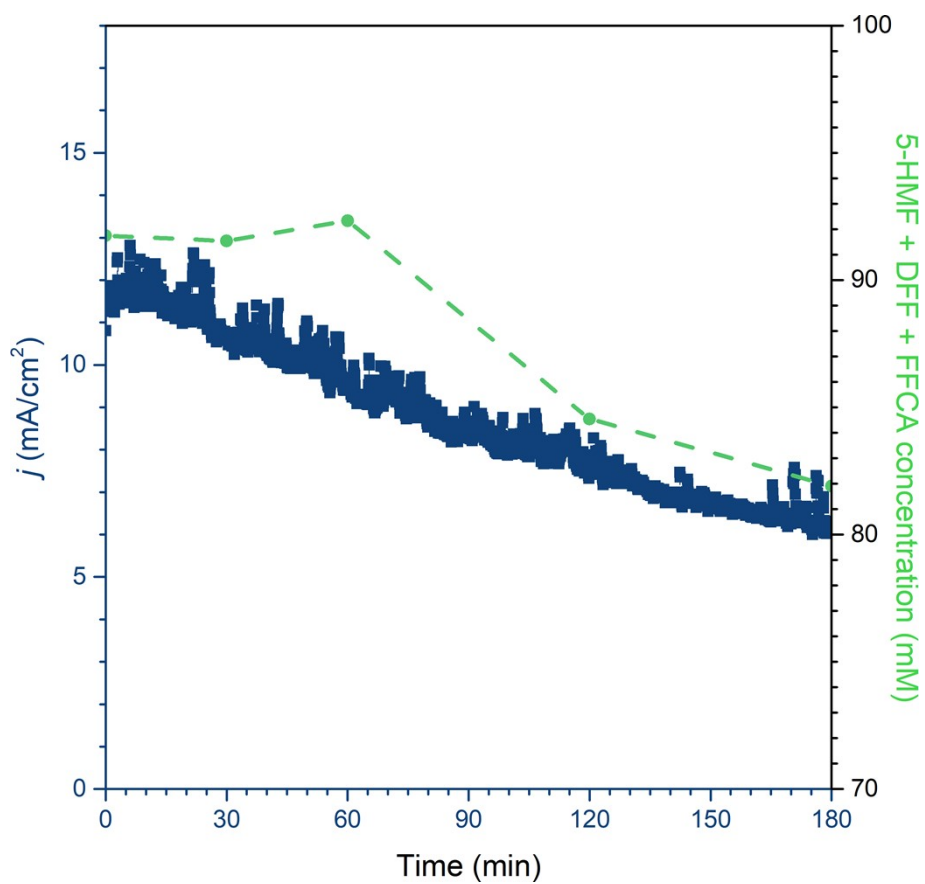

Figure S11. Current density and the sum of 5-HMF, DFF, and FFCA concentrations as function of electrolysis time obtained by chronoamperometry of Ni<sub>3</sub>B-NCs@CP with catalyst loading 0.75 mg/cm<sup>2</sup> in 0.1 M KOH (pH 12.9).

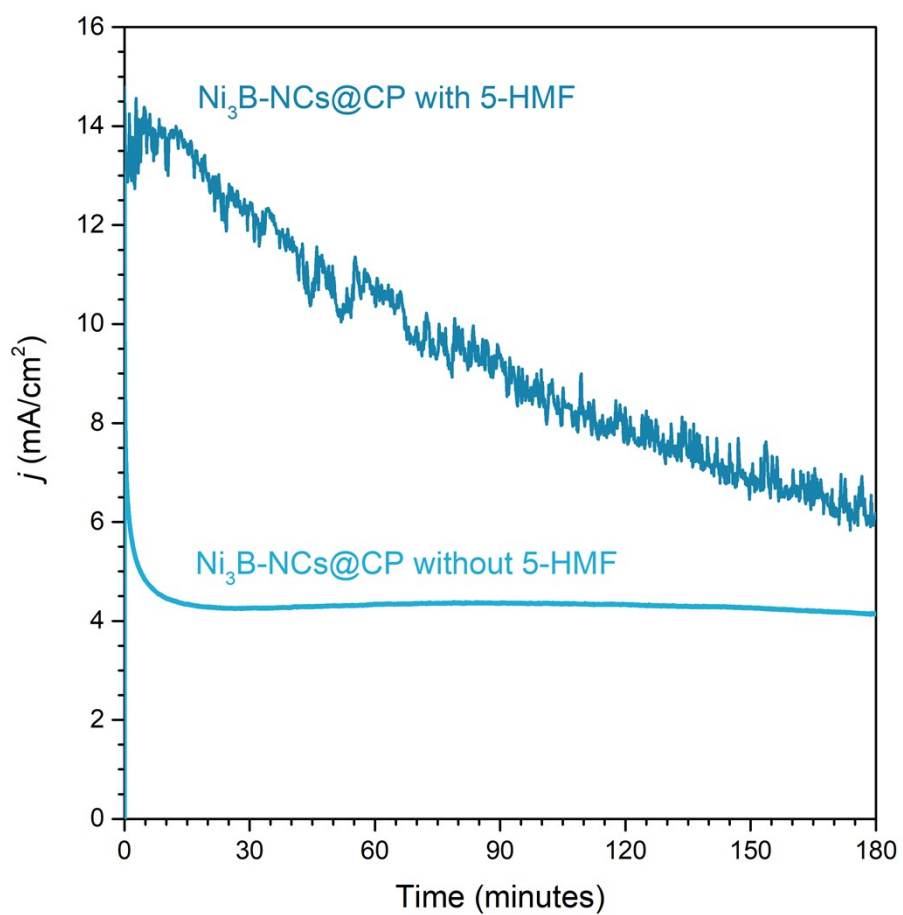

Figure S12. Chronoamperometry of Ni<sub>3</sub>B-NCs@CP with catalyst loading 0.05 mg/cm<sup>2</sup> in 0.1 M KOH (pH 12.9) at 1.8 V vs RHE with 100 mM of 5-HMF and no 5-HMF.

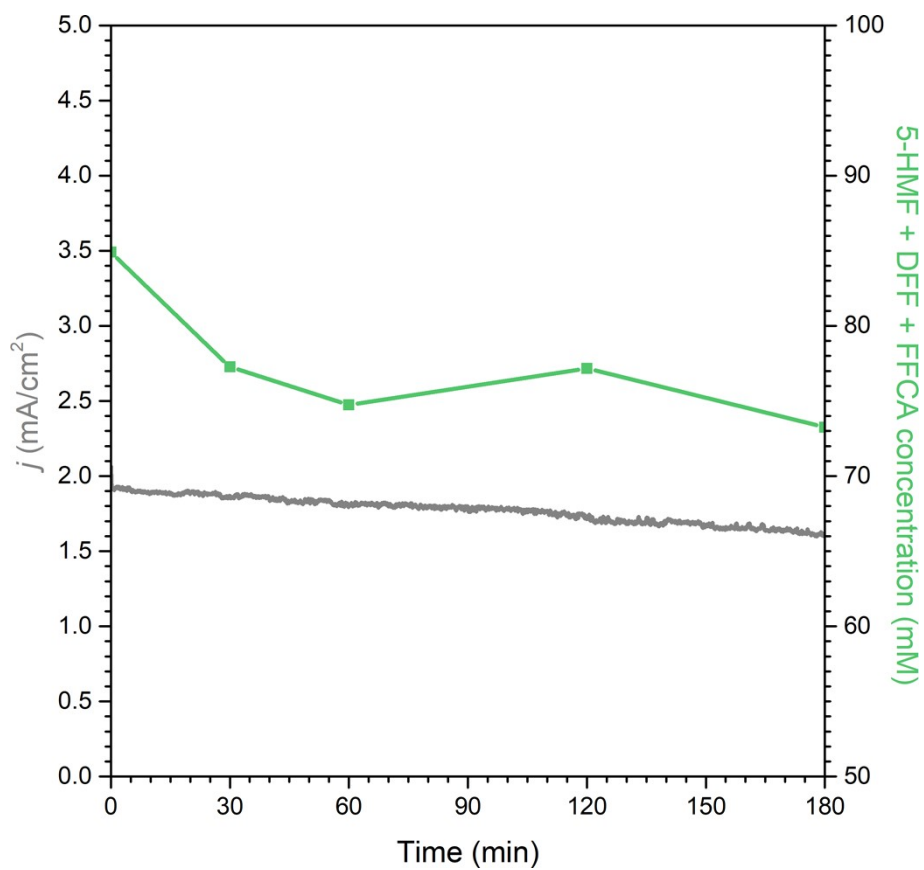

Figure S13. Current density and the sum of 5-HMF, DFF, and FFCA concentrations as function of electrolysis time obtained by chronoamperometry of carbon paper in 0.1 M KOH (pH 12.9).

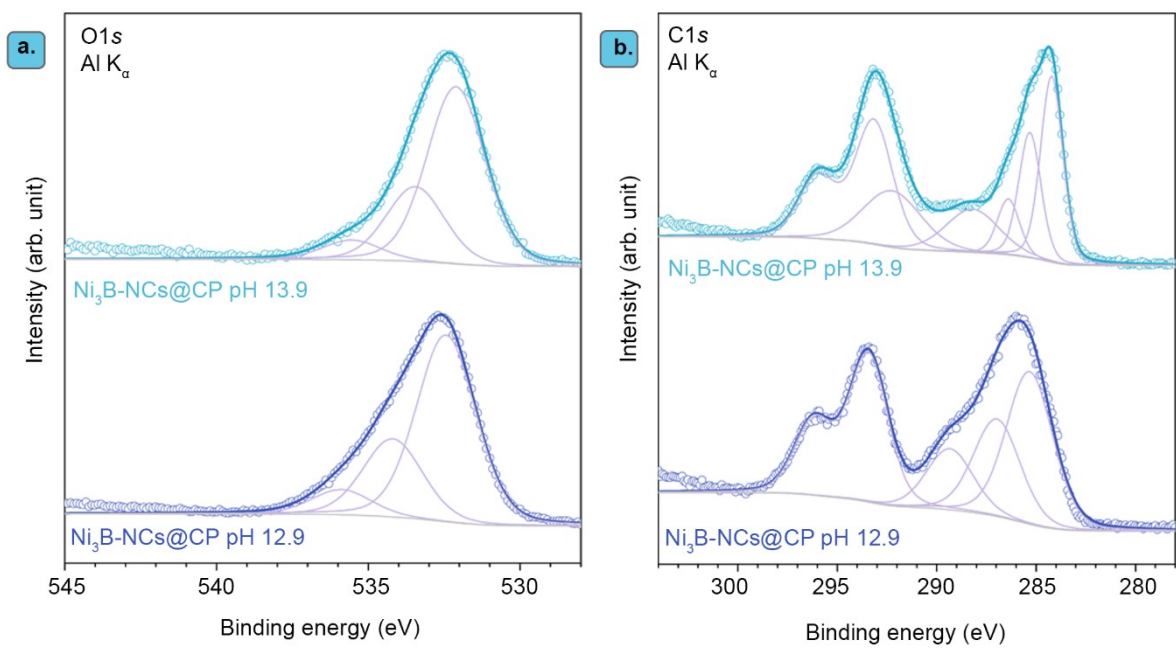

Figure S14. XPS spectra of the (a) O 1s and (b) C 1s core level regions of Ni<sub>3</sub>B-NCs@CP post electrocatalytic test at pH 12.9 (purple), and at pH 13.9 (blue).

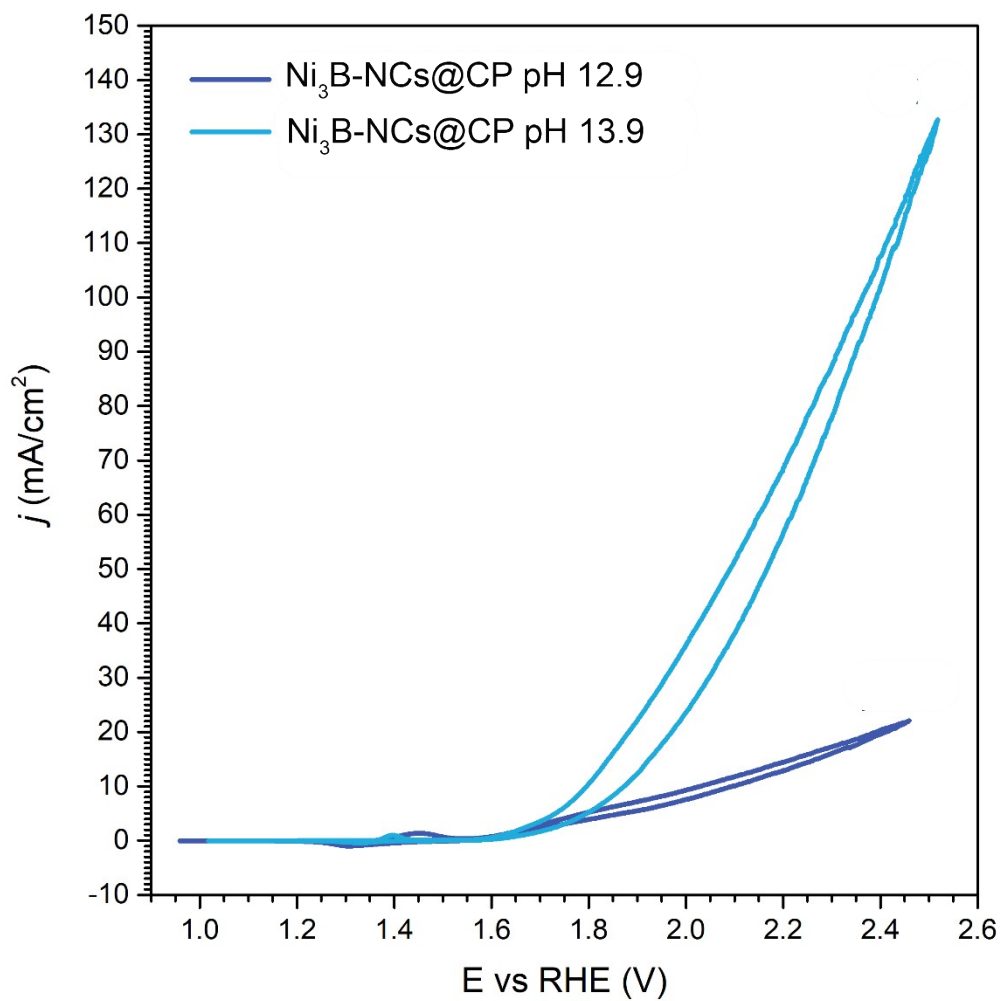

Figure S15. Cyclic voltammogram recorded with scan rate of 10 mV/S for Ni<sub>3</sub>B-NCs@CP (0.05 mg/cm<sup>2</sup>) measured at pH 12.9 (0.1 M KOH) and pH 13.9 (1.0 M KOH). These measurements were carried out in the absence of 5-HMF.

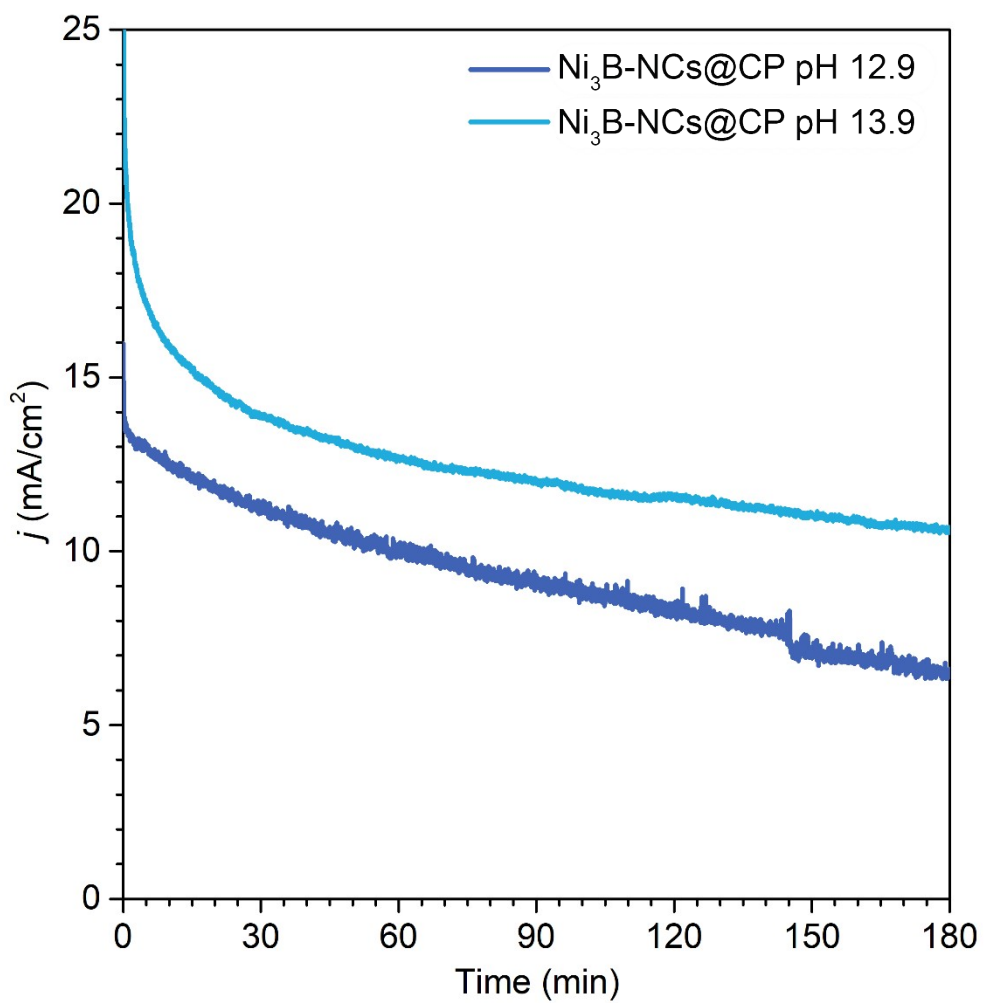

Figure S16. Chronoamperometry of Ni<sub>3</sub>B-NCs@CP (0.05 mg/cm<sup>2</sup>) conducted at constant potential 1.8 V vs RHE for 3 hours in the presence of 5-HMF (100 mM) at pH 12.9 (0.1 M KOH, dark blue line) and pH 13.9 (1.0 M KOH, light blue line).



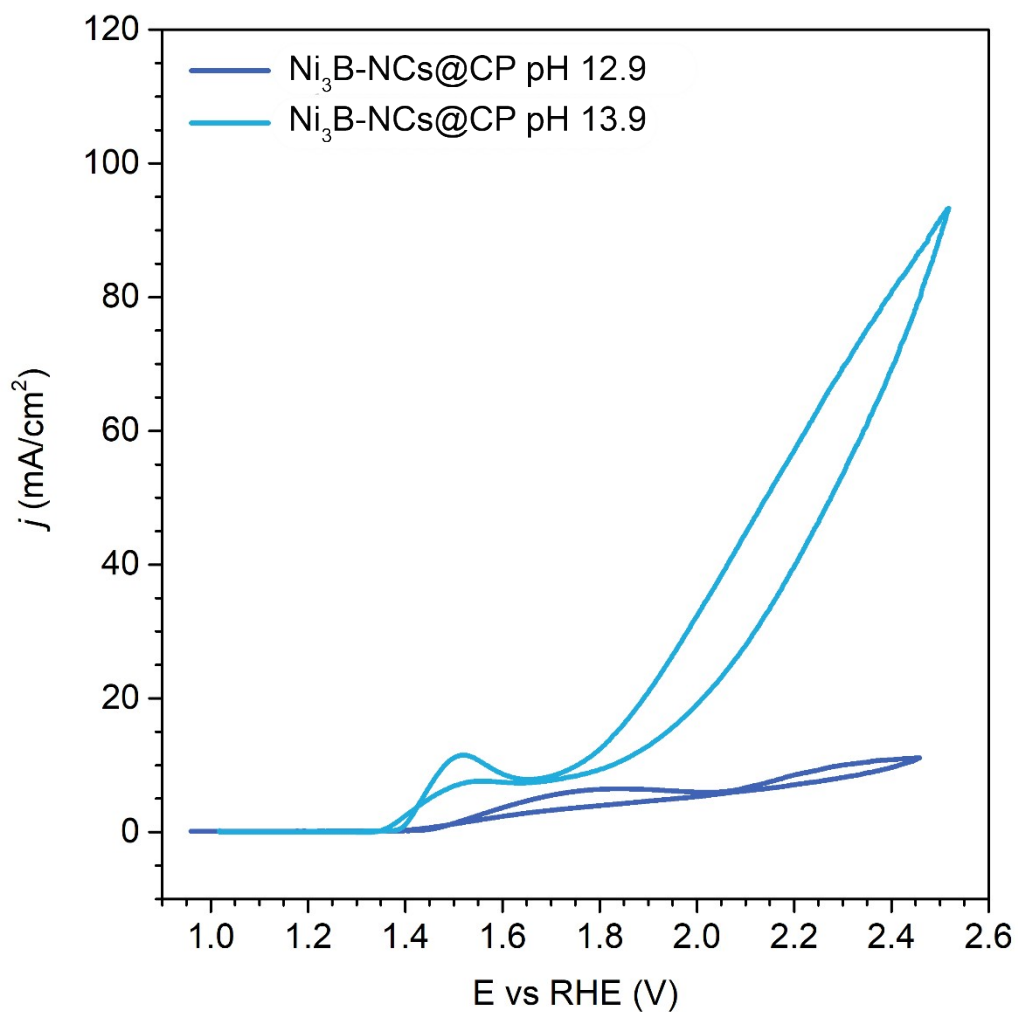

Figure S17. Cyclic voltammograms recorded with a scan rate of 10 mV/S for Ni<sub>3</sub>B-NCs@CP (0.05 mg/cm<sup>2</sup>) measured at pH 12.9 (0.1 M KOH) and pH 13.9 (1.0 M KOH) after 3 hours of 5-HMF electrooxidation (chronoamperometry at 1.8 V vs RHE).

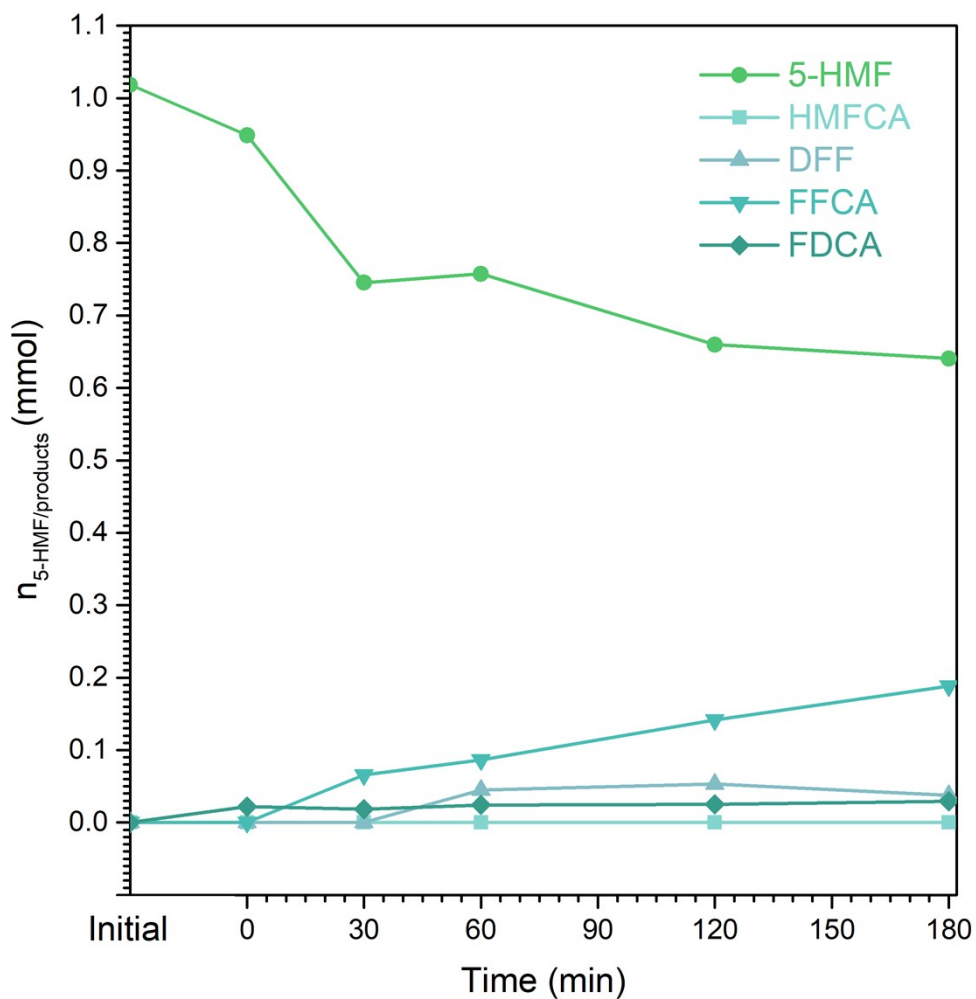

Figure S18. Concentration profiles of 5-HMF and the possible 5-HMF oxidation products (HMFCFA, DFF, FFCA, FDCA) measured throughout 3 hours of chronoamperometry with Ni<sub>3</sub>B-NCs@CP (0.05 mg/cm<sup>2</sup>) at 1.8 V vs RHE in 0.1 M KOH (pH 12.9).

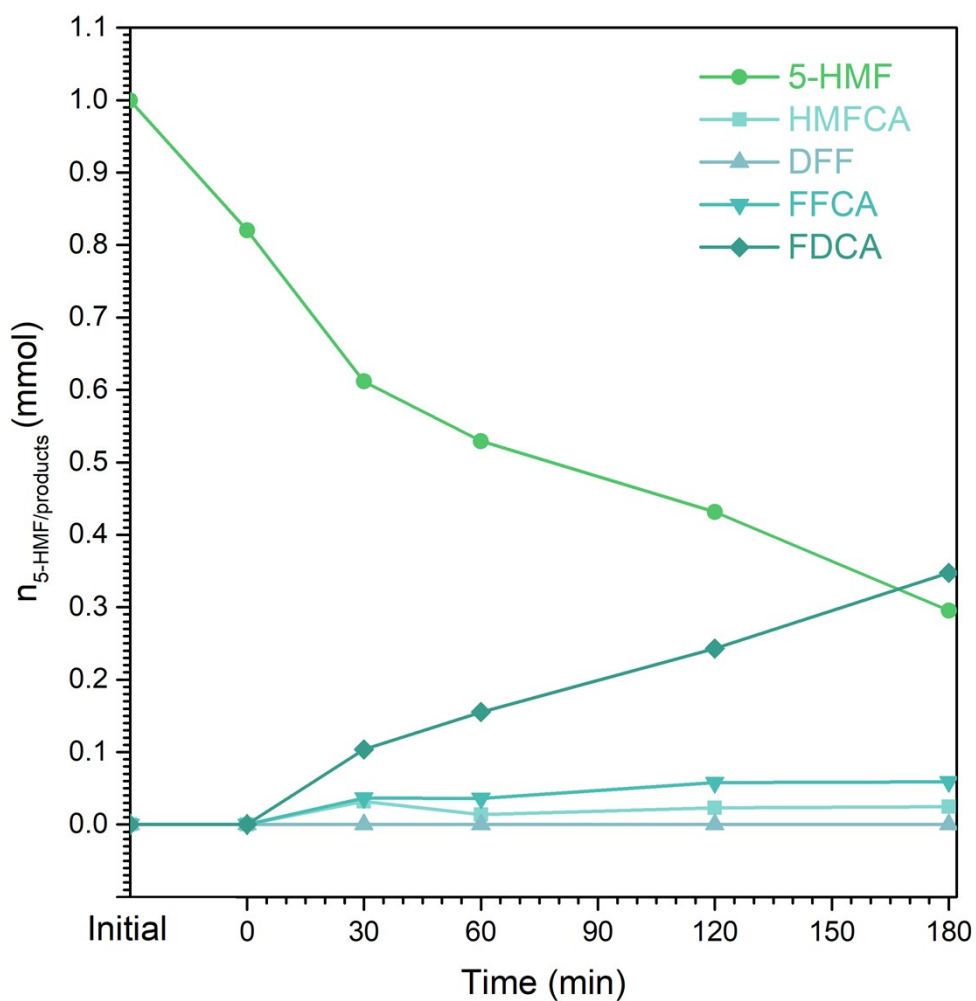

Figure S19. Concentration profiles of 5-HMF and the possible 5-HMF oxidation products (HMFCA, DFF, FFCA, FDCA) measured throughout 3 hours of chronoamperometry with Ni<sub>3</sub>B-NCs@CP (0.05 mg/cm<sup>2</sup>) at 1.8 V vs RHE in 1 M KOH (pH 13.9).

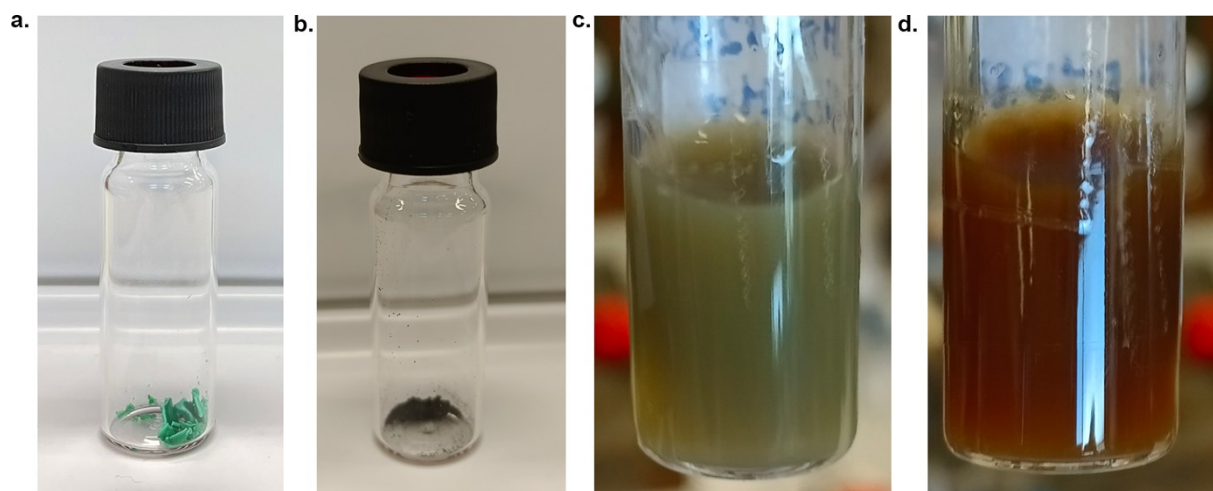

Figure S20. Images of (a) synthesized  $\text{Ni}(\text{OH})_2$  powder; (b)  $\text{NiOOH}$  powder; (c)  $\text{NiOOH}$  mixed with 5-HMF in 0.1 M KOH; (d)  $\text{NiOOH}$  mixed with 5-HMF in 1 M KOH.

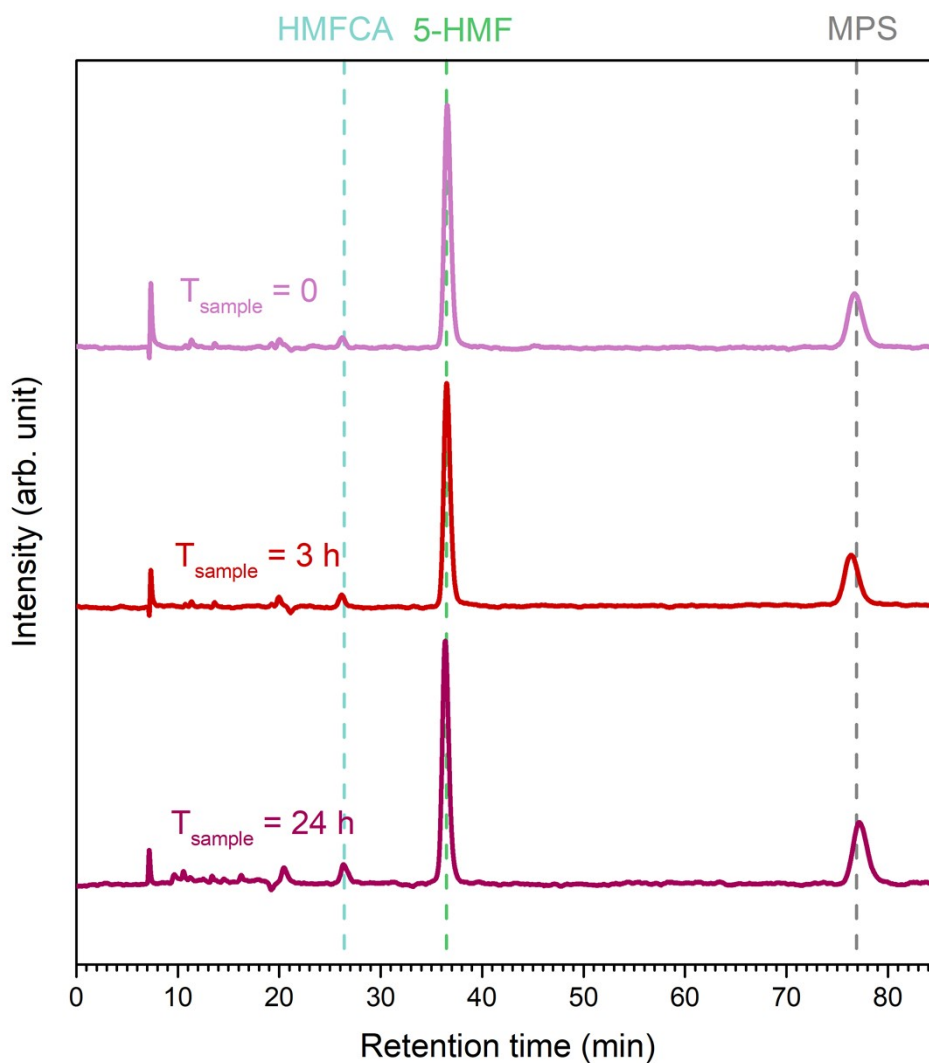

Figure S21. High performance liquid chromatographs (HPLC) analysis recorded by immersing NiOOH in a 5-HMF-containing 0.1 M KOH (pH 12.9) without applying potential. Equimolar amounts of NiOOH and 5-HMF were mixed in 0.1 M KOH and stirred at room temperature. Samples were collected at different times for product analysis. Methyl phenyl sulfone (MPS) was added as internal standard.

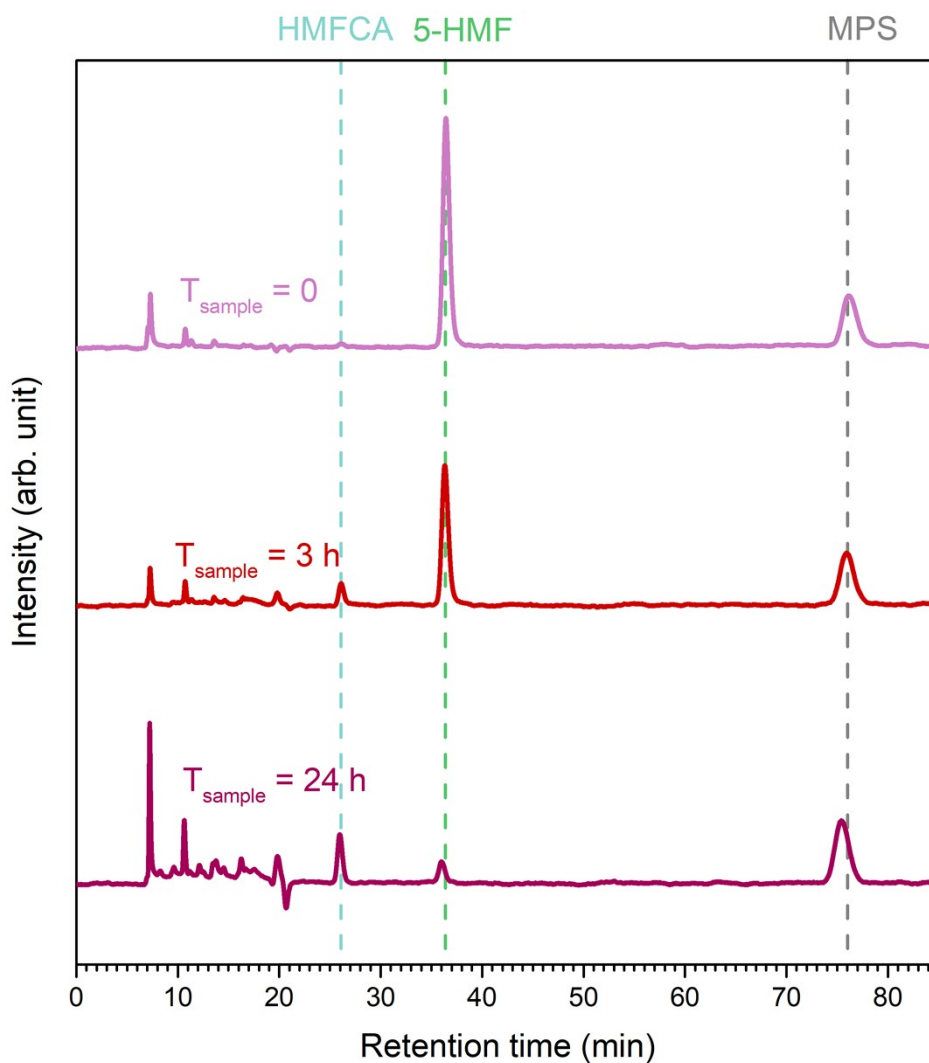

Figure S22. High performance liquid chromatographs (HPLC) analysis recorded by immersing NiOOH in a 5-HMF-containing 0.1 M KOH (pH 12.9) without applying potential. Equimolar amounts of NiOOH and 5-HMF were mixed in 0.1 M KOH and stirred at room temperature. Samples were collected at different times for product analysis. Methyl phenyl sulfone (MPS) was added as internal standard.

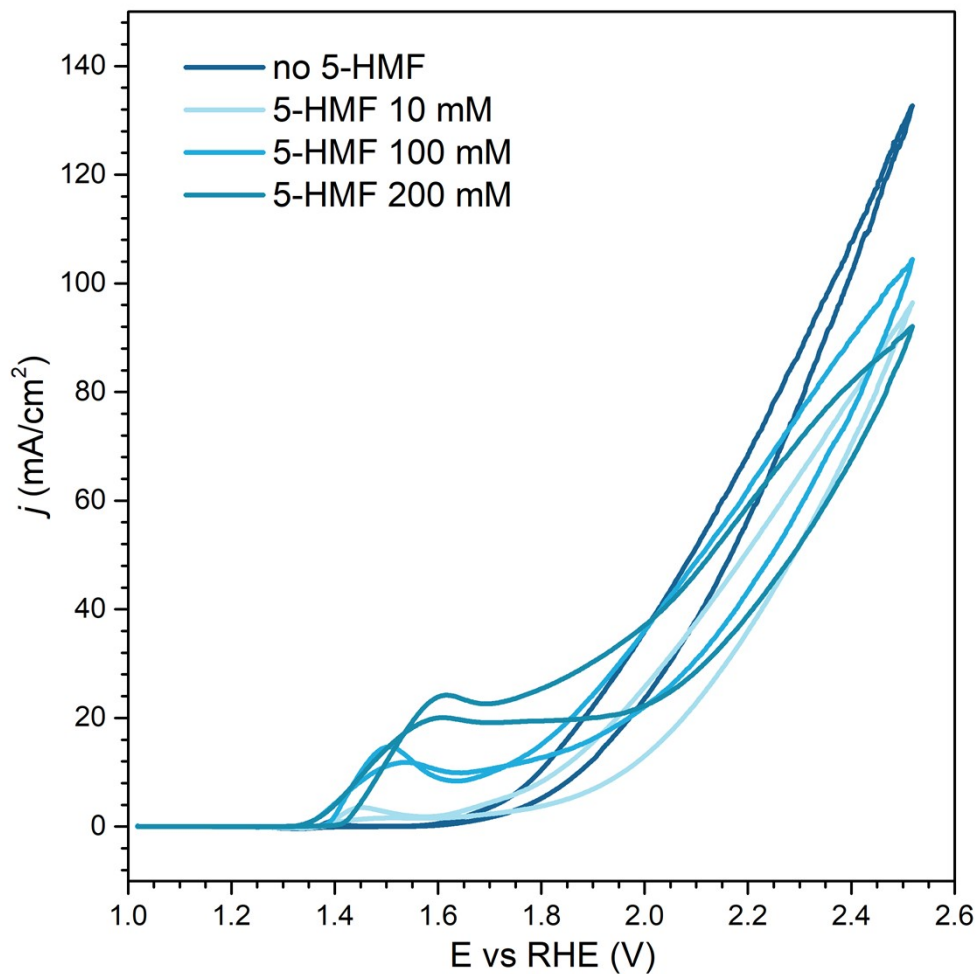

Figure S23. Cyclic voltammetry recorded with scan rate of 10 mV/S for Ni<sub>3</sub>B-NCs@CP (0.05 mg/cm<sup>2</sup>) measured in 1.0 M KOH (pH 13.9) in the presence of different concentration of 5-HMF (10, 100, 200 mM).

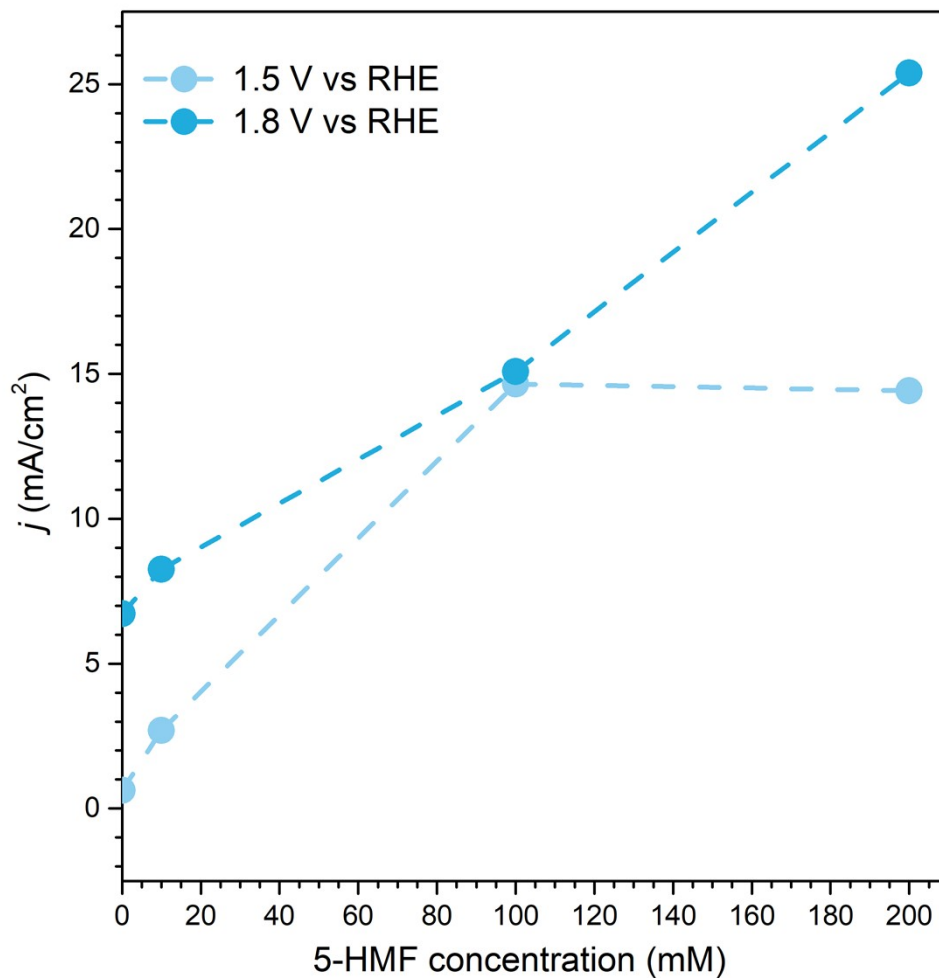

Figure S24. Effect of 5-HMF concentration in the electrolyte (1.0 M KOH) to the current density measured at two potentials (1.5 V vs RHE and 1.8 V vs RHE). The working electrode in this study was Ni<sub>3</sub>B-NCs@CP with catalyst loading 0.05 mg/cm<sup>2</sup>. The data points plotted in this graph were collected from cyclic voltammogram measured at a scan rate of 10 mV/s.



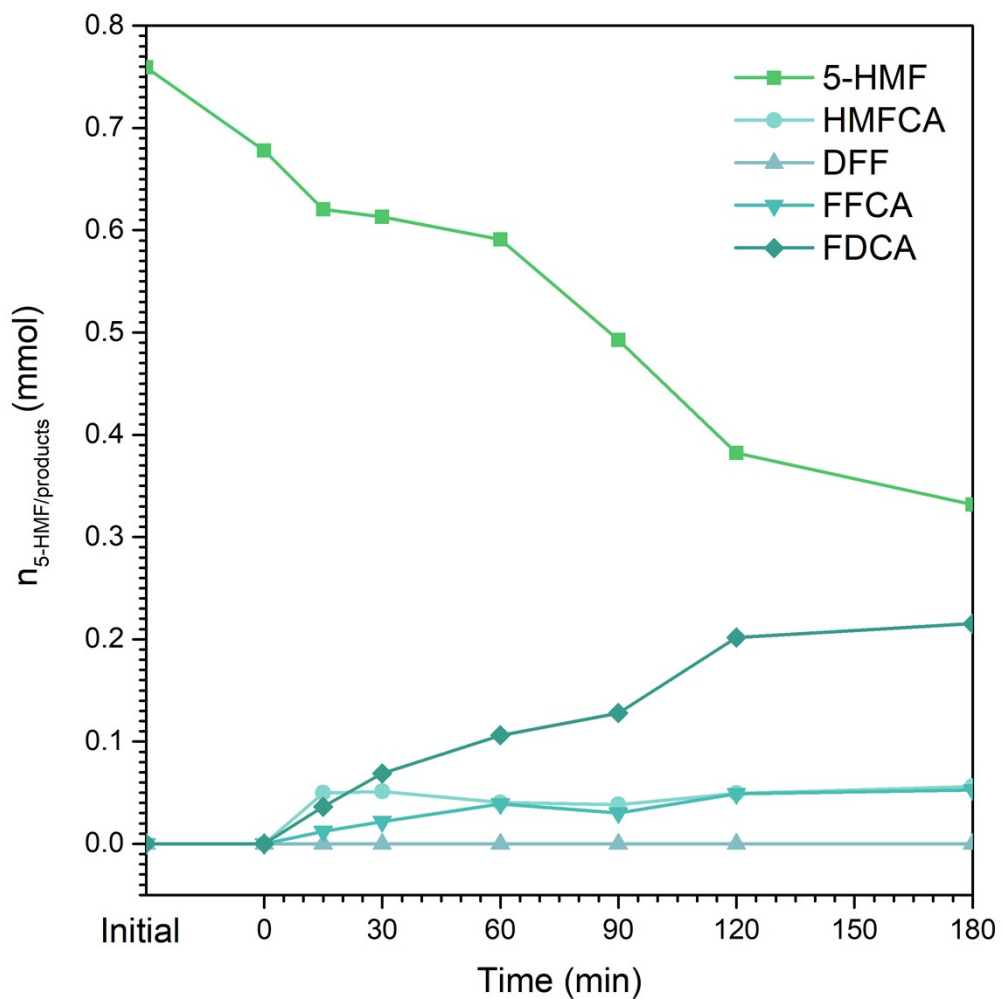

Figure S25. Concentration profiles of 5-HMF and the possible 5-HMF oxidation products (HMFCFA, DFF, FFCA, FDCA) measured throughout 3 hours of chronoamperometry with Ni<sub>3</sub>B-NCs@CP (0.05 mg/cm<sup>2</sup>) at 1.5 V vs RHE in 1 M KOH (pH 13.9).

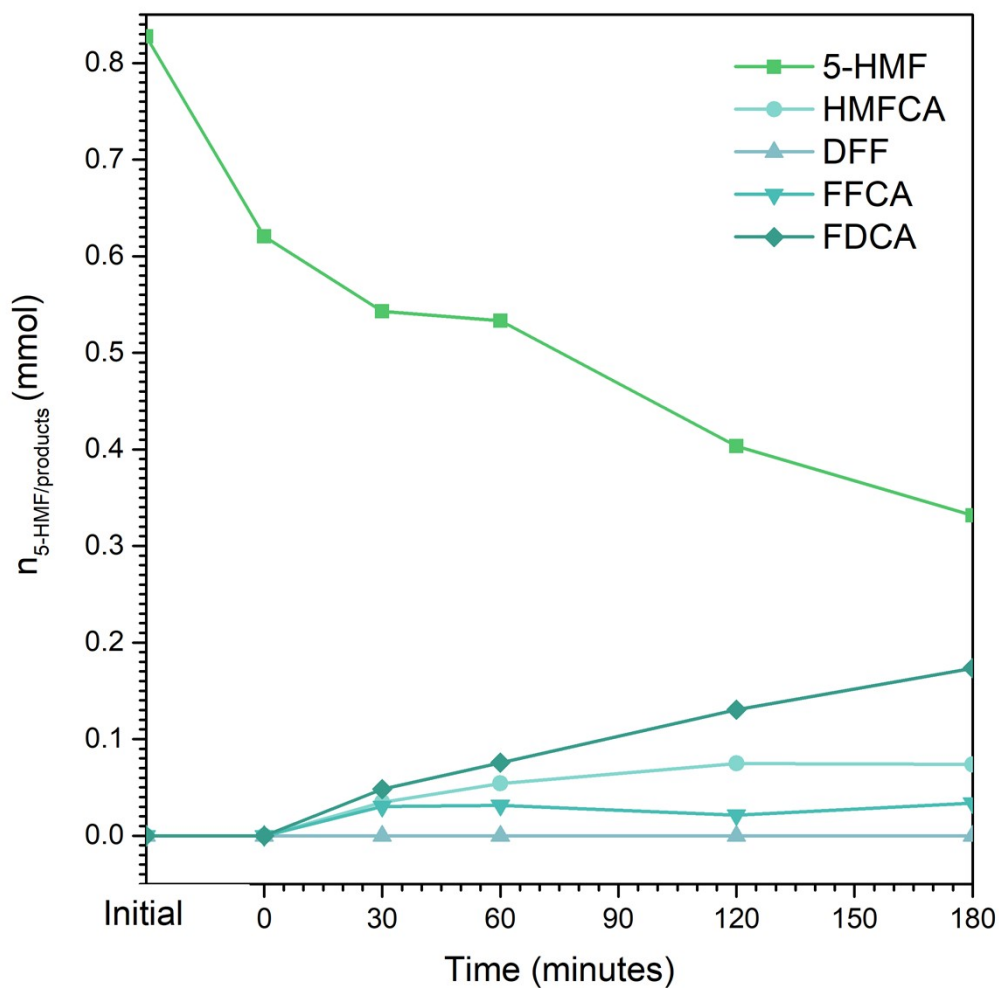

Figure S26. Concentration profiles of 5-HMF and the possible 5-HMF oxidation products (HMFCFA, DFF, FFCA, FDCA) measured throughout 3 hours of chronoamperometry with Ni<sub>3</sub>B-NCs@CP (0.05 mg/cm<sup>2</sup>) at 1.6 V vs RHE in 1 M KOH (pH 13.9).

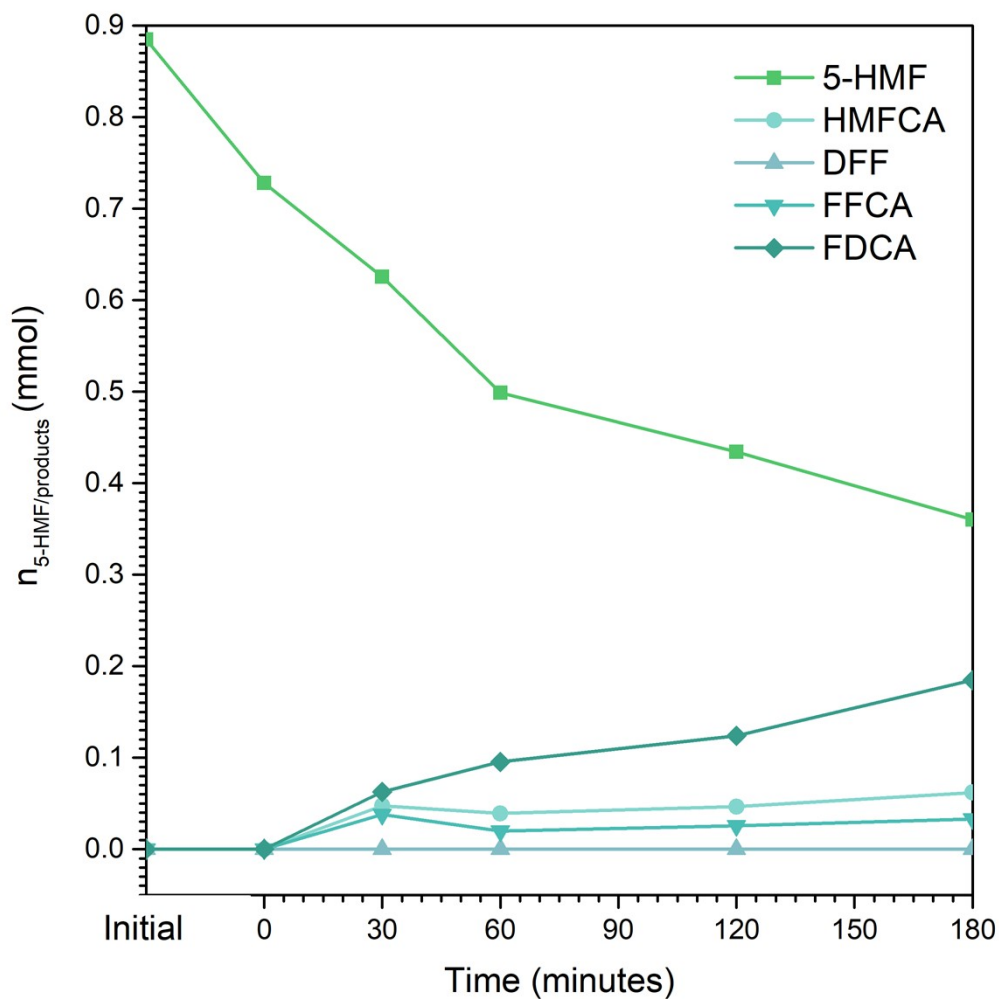

Figure S27. Concentration profiles of 5-HMF and the possible 5-HMF oxidation products (HMFCFA, DFF, FFCA, FDCA) measured throughout 3 hours of chronoamperometry with Ni<sub>3</sub>B-NCs@CP (0.05 mg/cm<sup>2</sup>) at 1.7 V vs RHE in 1 M KOH (pH 13.9).

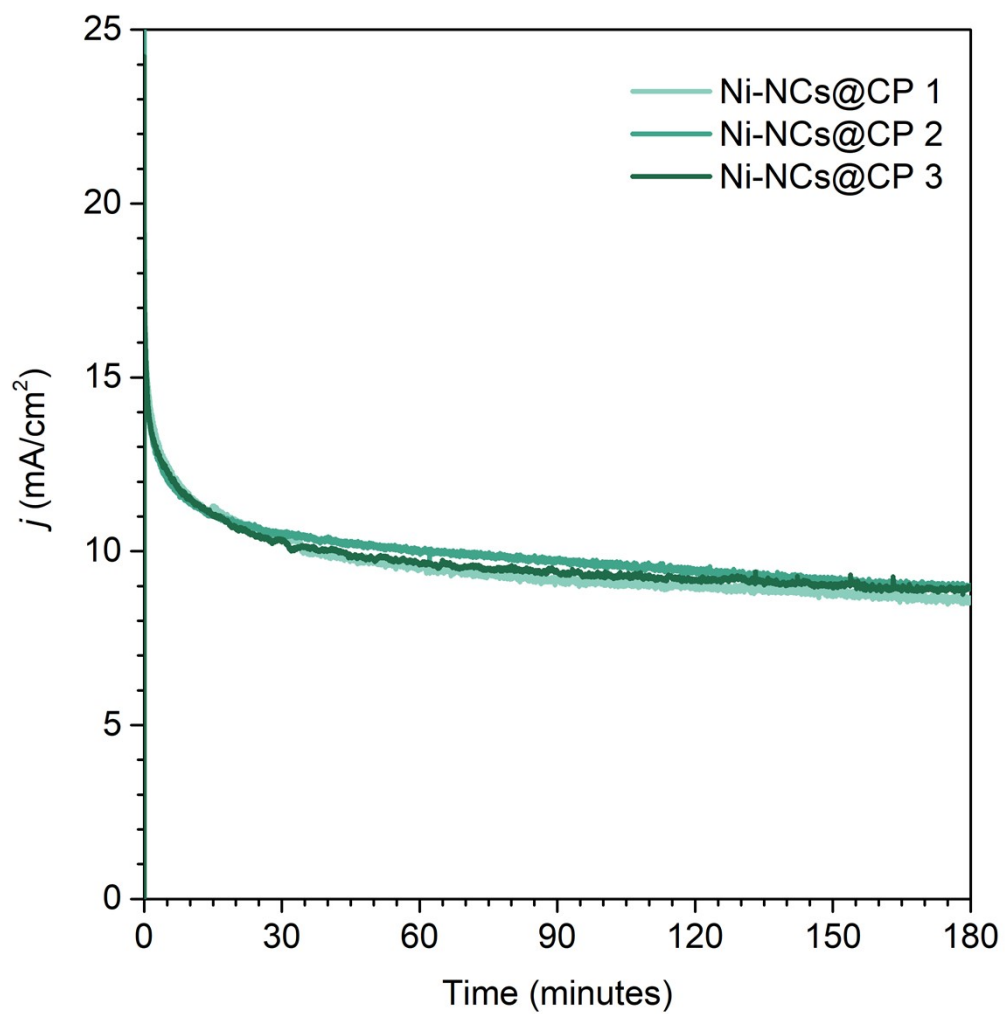

Figure S28. Three independent chronoamperometry of Ni-NCs@CP (0.05 mg/cm<sup>2</sup>) conducted at constant potential 1.8 V vs RHE for 3 hours in the presence of 5-HMF (100 mM) at pH 13.9.

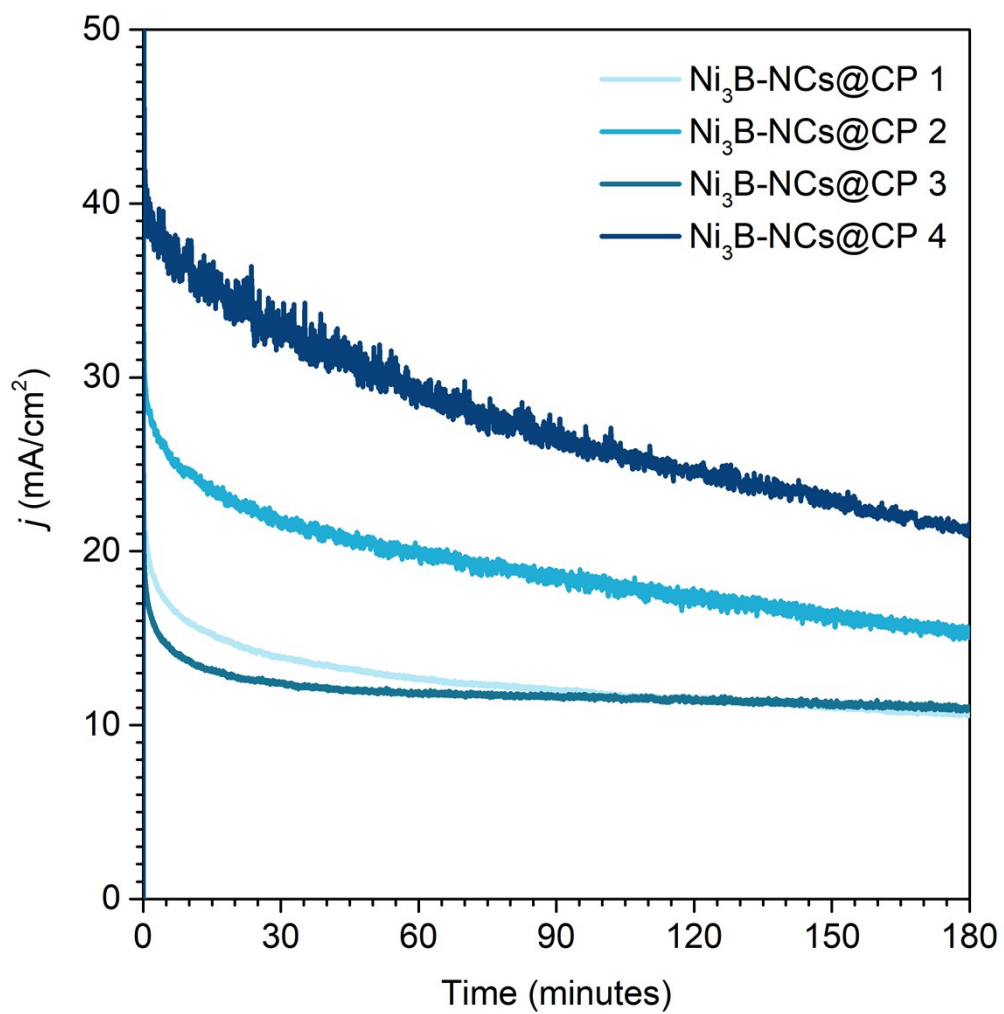

Figure S29. Three independent chronoamperometry of Ni<sub>3</sub>B-NCs@CP (0.05 mg/cm<sup>2</sup>) conducted at constant potential 1.8 V vs RHE for 3 hours in the presence of 5-HMF (100 mM) at pH 13.9.

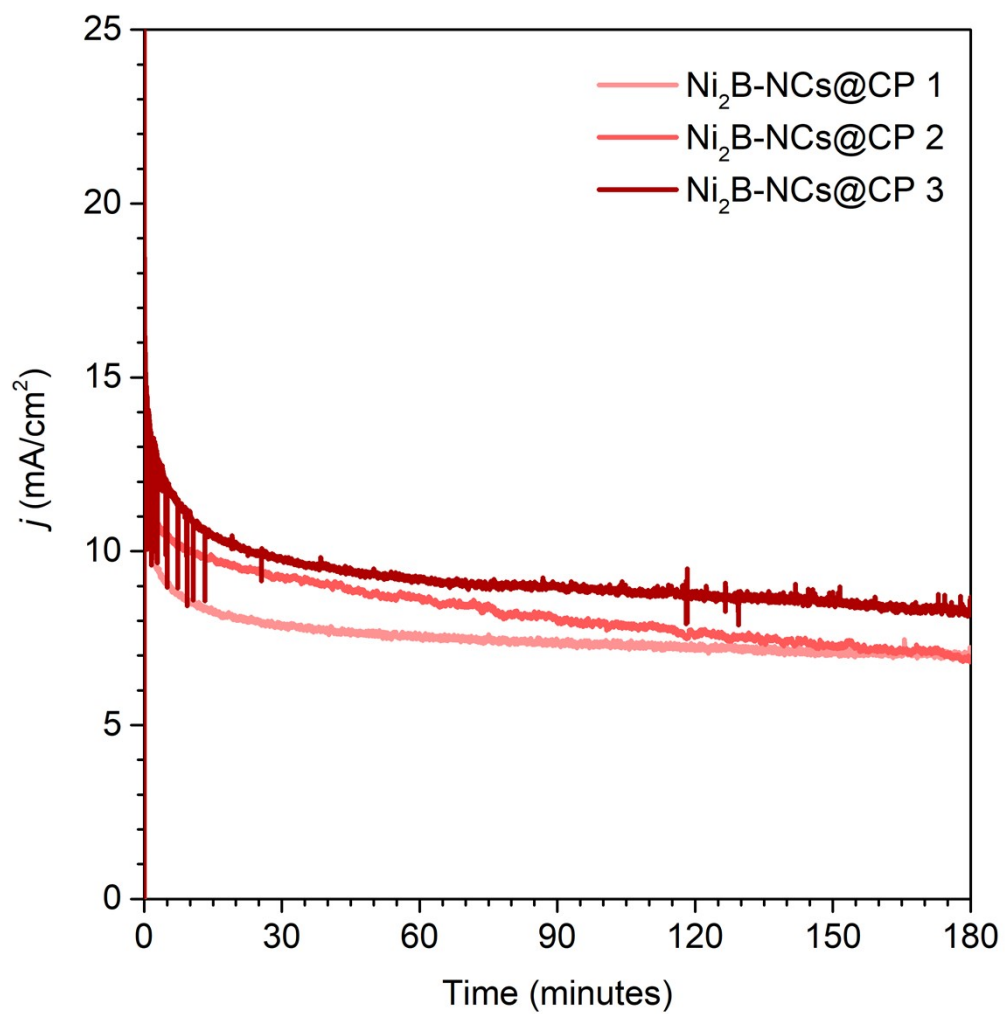

Figure S30. Three independent chronoamperometry of Ni<sub>2</sub>B-NCs@CP (0.05 mg/cm<sup>2</sup>) conducted at constant potential 1.8 V vs RHE for 3 hours in the presence of 5-HMF (100 mM) at pH 13.9.

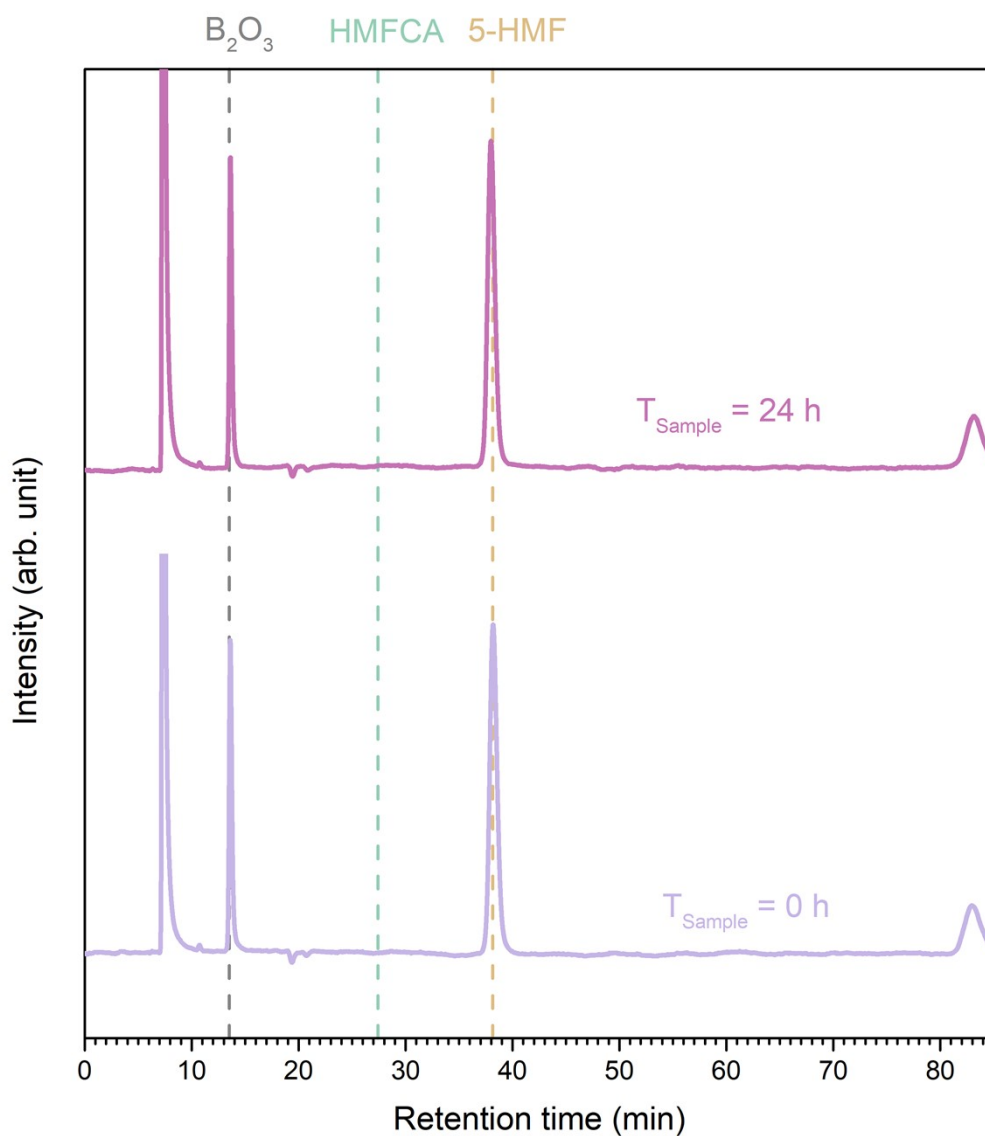

Figure S31. High performance liquid chromatographs (HPLC) analysis recorded by immersing B<sub>2</sub>O<sub>3</sub> in a 5-HMF-containing 0.1 M KOH (pH 12.9) without applying potential. Equimolar amounts of B<sub>2</sub>O<sub>3</sub> and 5-HMF were mixed in 0.1 M KOH and stirred at room temperature. Samples were collected at different times for product analysis. Methyl phenyl sulfone (MPS) was added as internal standard.

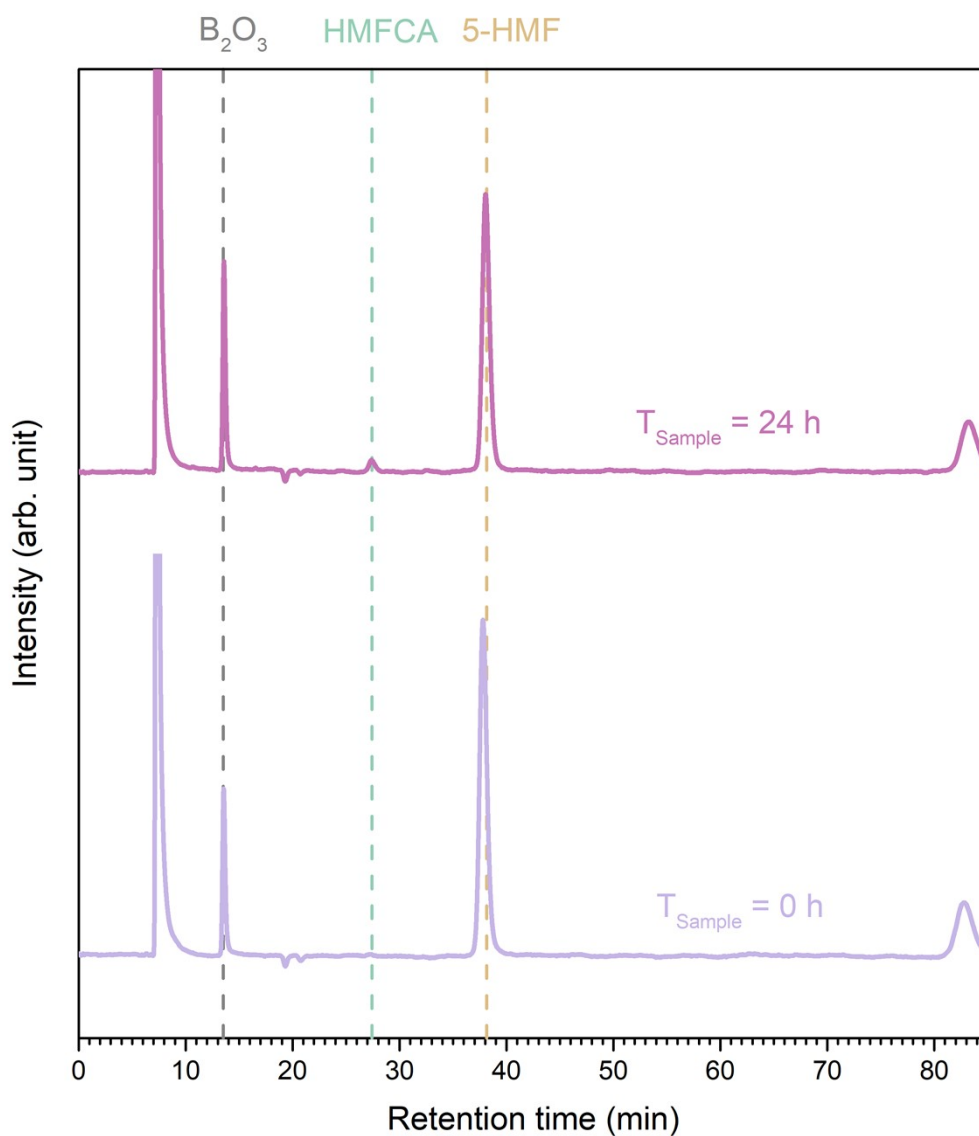

Figure S32. High performance liquid chromatographs (HPLC) analysis recorded by immersing B<sub>2</sub>O<sub>3</sub> in a 5-HMF-containing 0.1 M KOH (pH 13.9) without applying potential. Equimolar amounts of B<sub>2</sub>O<sub>3</sub> and 5-HMF were mixed in 1 M KOH and stirred at room temperature. Samples were collected at different times for product analysis. Methyl phenyl sulfone (MPS) was added as internal standard.



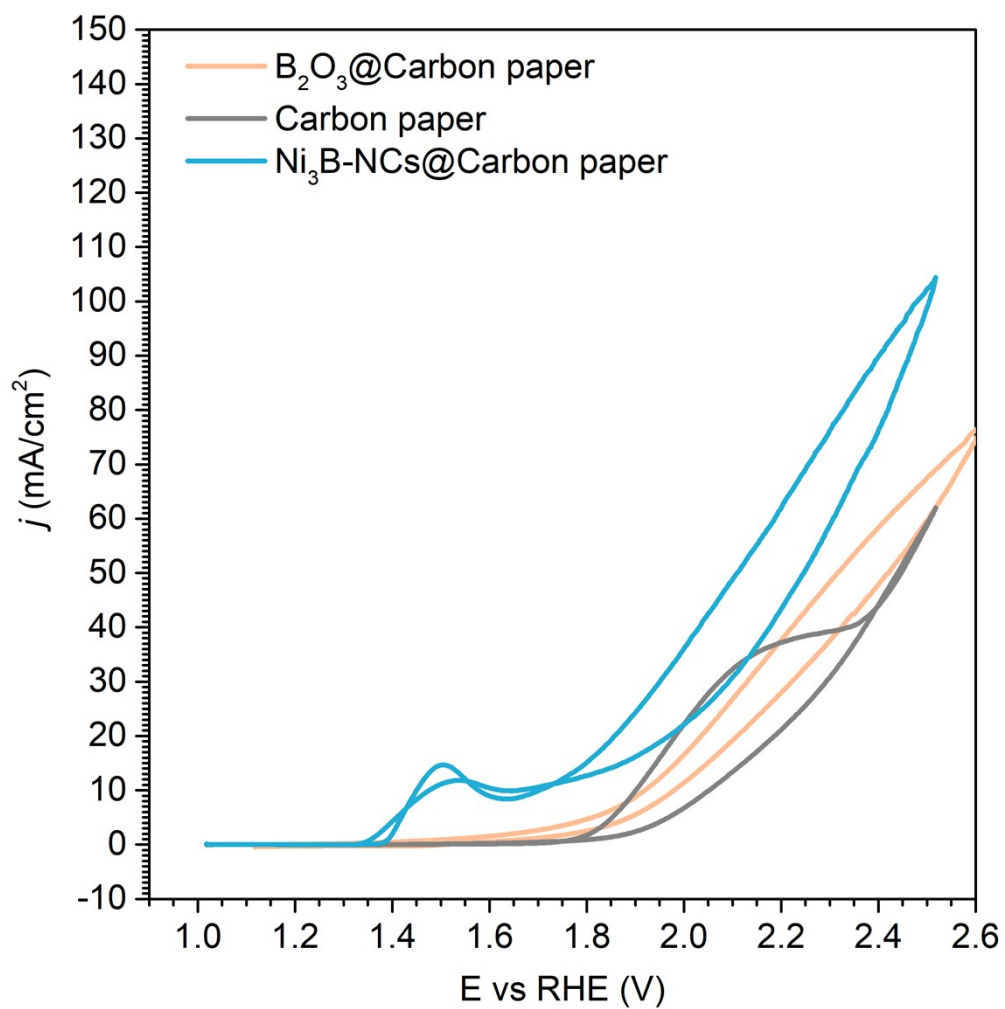

Figure S33. Cyclic voltammetry recorded with scan rate of 10 mV/S for B<sub>2</sub>O<sub>3</sub>@CP (1 mg/cm<sup>2</sup>), carbon paper, and Ni<sub>3</sub>B-NCs@CP (0.05 mg/cm<sup>2</sup>) measured in 1.0 M KOH (pH 13.9) in the presence of 100 mM 5-HMF.

## Recycling tests

The figures below (S34-S38) present the chronoamperometries and the reactants concentration profiles for the recycling tests of the Ni<sub>3</sub>B-NCs@CP electrocatalyst. It is worth noting that higher initial current densities (but also higher level of noise) were observed the second and third run of the electrode recyclability tests, most likely due to the higher environmental temperature during those experiments, which also resulted in higher 5-HMF conversion.

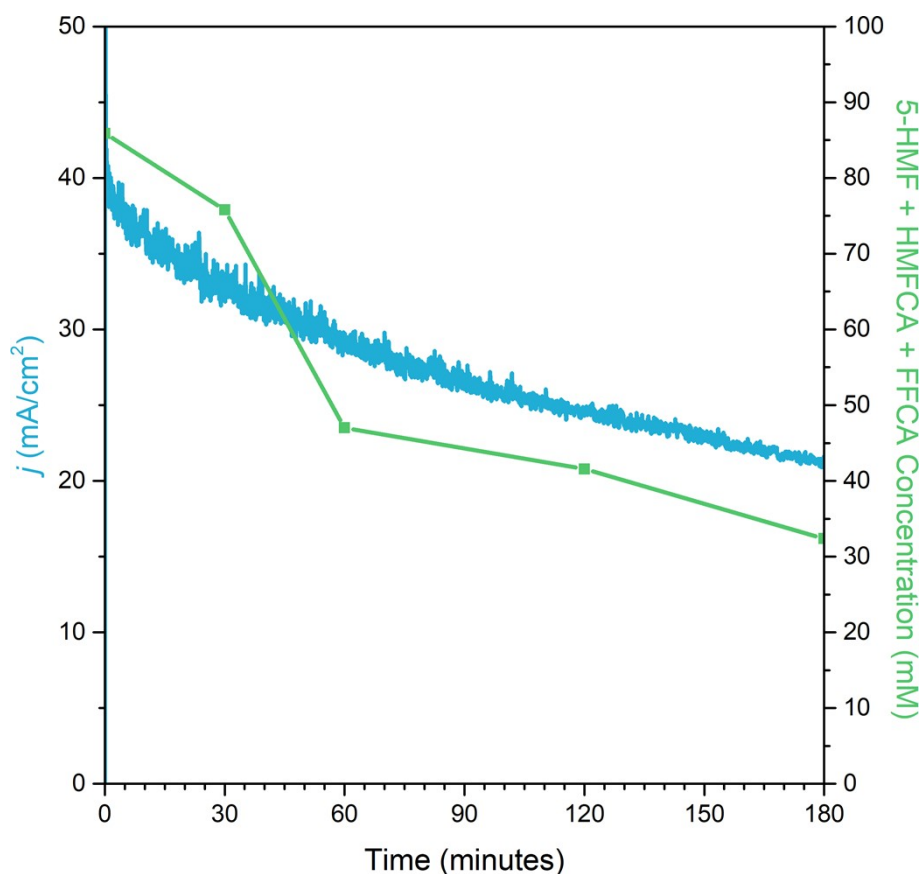

Figure S34. 1<sup>st</sup> chronoamperometric run of Ni<sub>3</sub>B-NCs@CP conducted at constant potential 1.8 V vs RHE for 3 hours showing current density and the sum of 5-HMF, HMFCGA, and FFCA concentrations as a function of time.

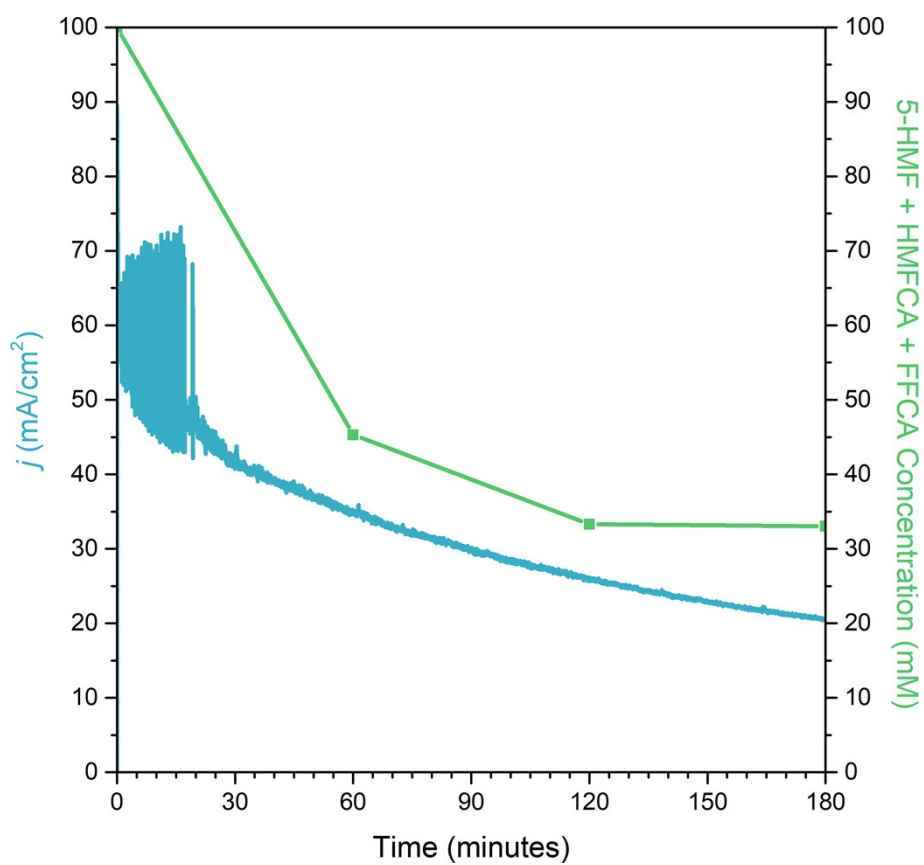

Figure S35. 2<sup>nd</sup> chronoamperometric run of Ni<sub>3</sub>B-NCs@CP conducted at constant potential 1.8 V vs RHE for 3 hours showing current density and the sum of 5-HMF, HMFCA, and FFCA concentrations as a function of time.

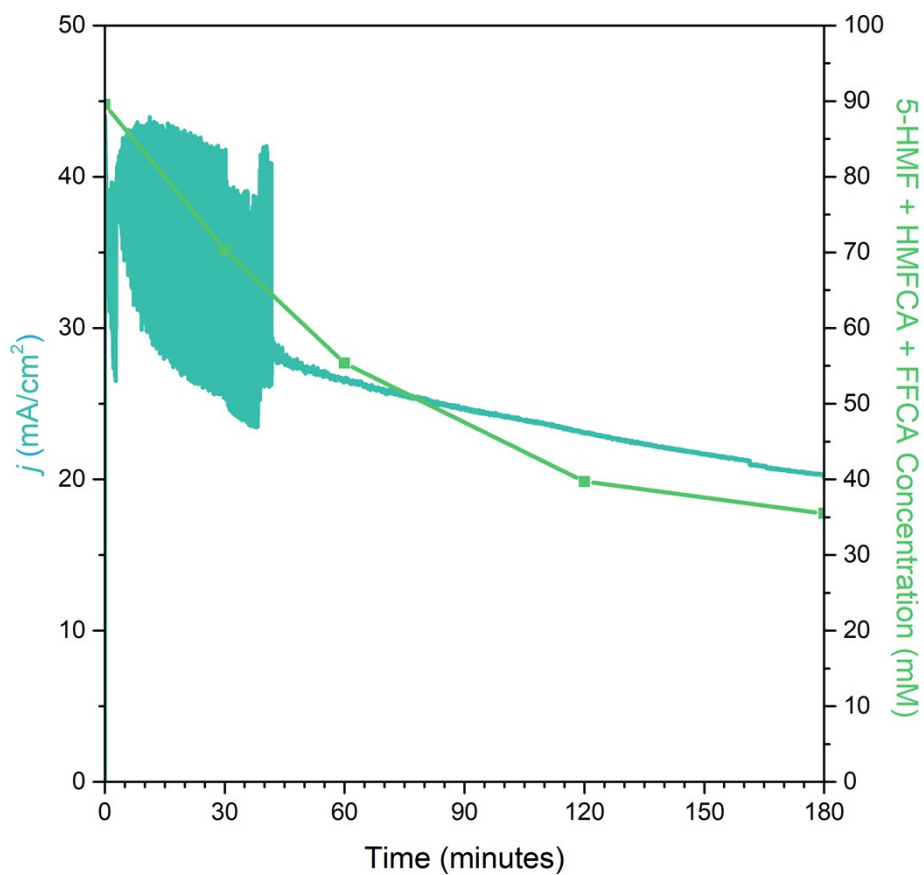

Figure S36. 3<sup>rd</sup> chronoamperometric run of Ni<sub>3</sub>B-NCs@CP conducted at constant potential 1.8 V vs RHE for 3 hours showing current density and the sum of 5-HMF, HMFCFA, and FFCA concentrations as a function of time.

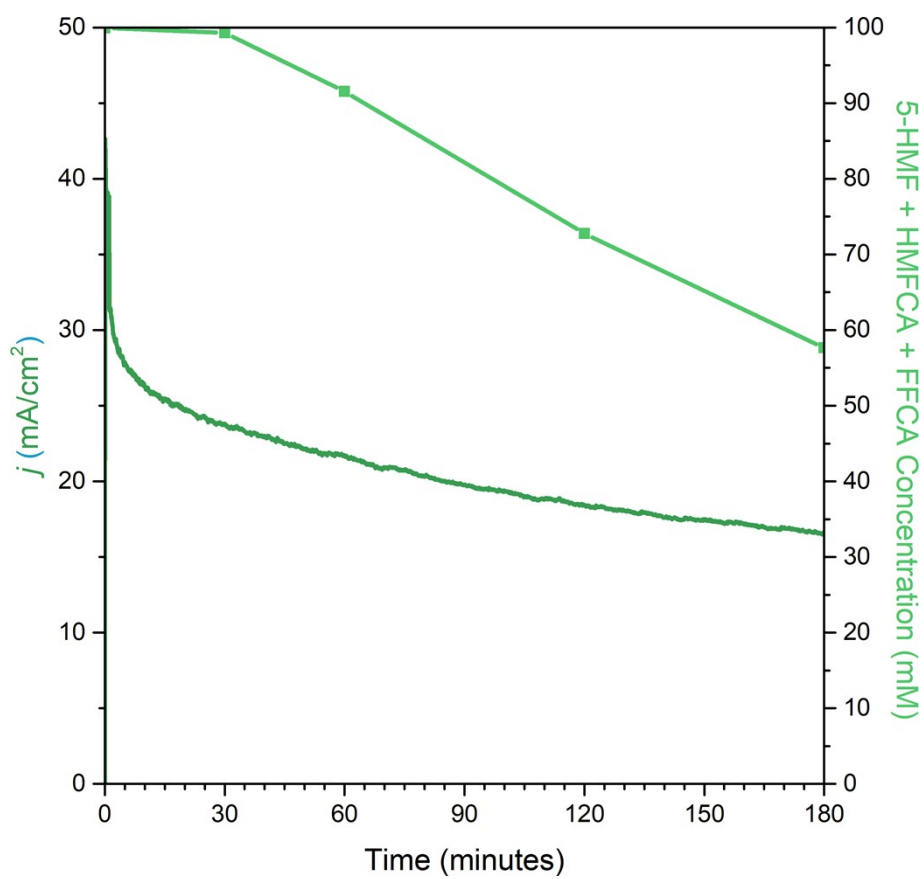

Figure S37. 4<sup>th</sup> chronoamperometric run of Ni<sub>3</sub>B-NCs@CP conducted at constant potential 1.8 V vs RHE for 3 hours showing current density and the sum of 5-HMF, HMFCA, and FFCA concentrations as a function of time.

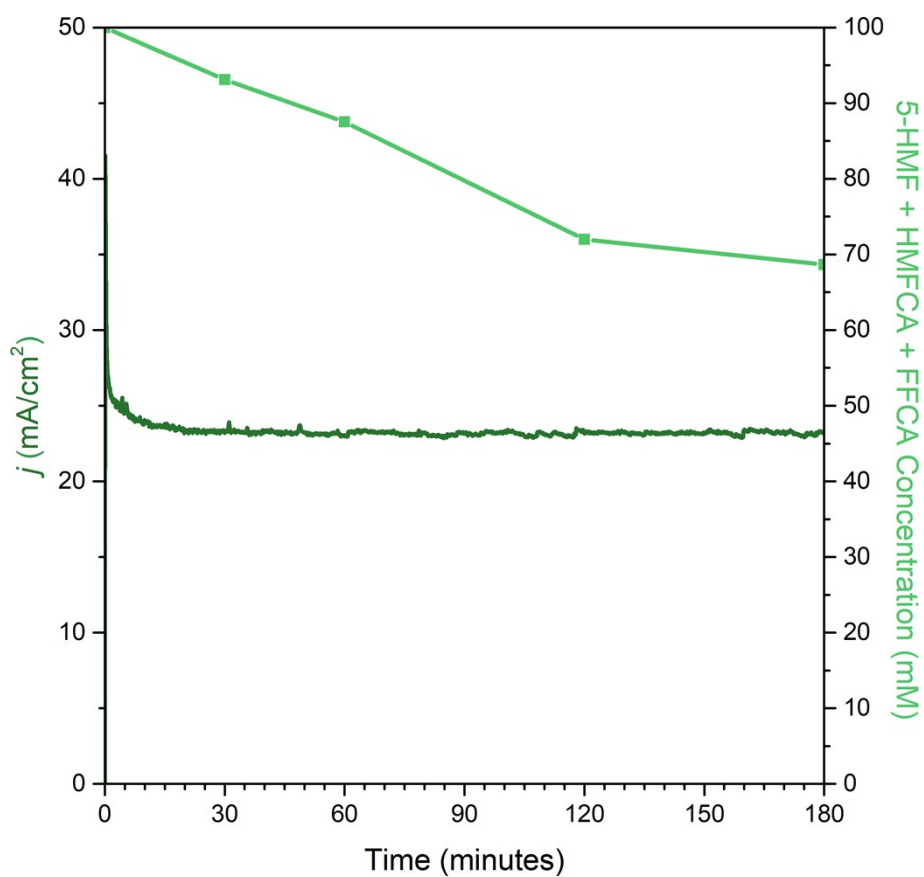

Figure S38. 5<sup>th</sup> chronoamperometric run of Ni<sub>3</sub>B-NCs@CP conducted at constant potential 1.8 V vs RHE for 3 hours showing current density and the sum of 5-HMF, HMFCA, and FFCA concentrations as a function of time.

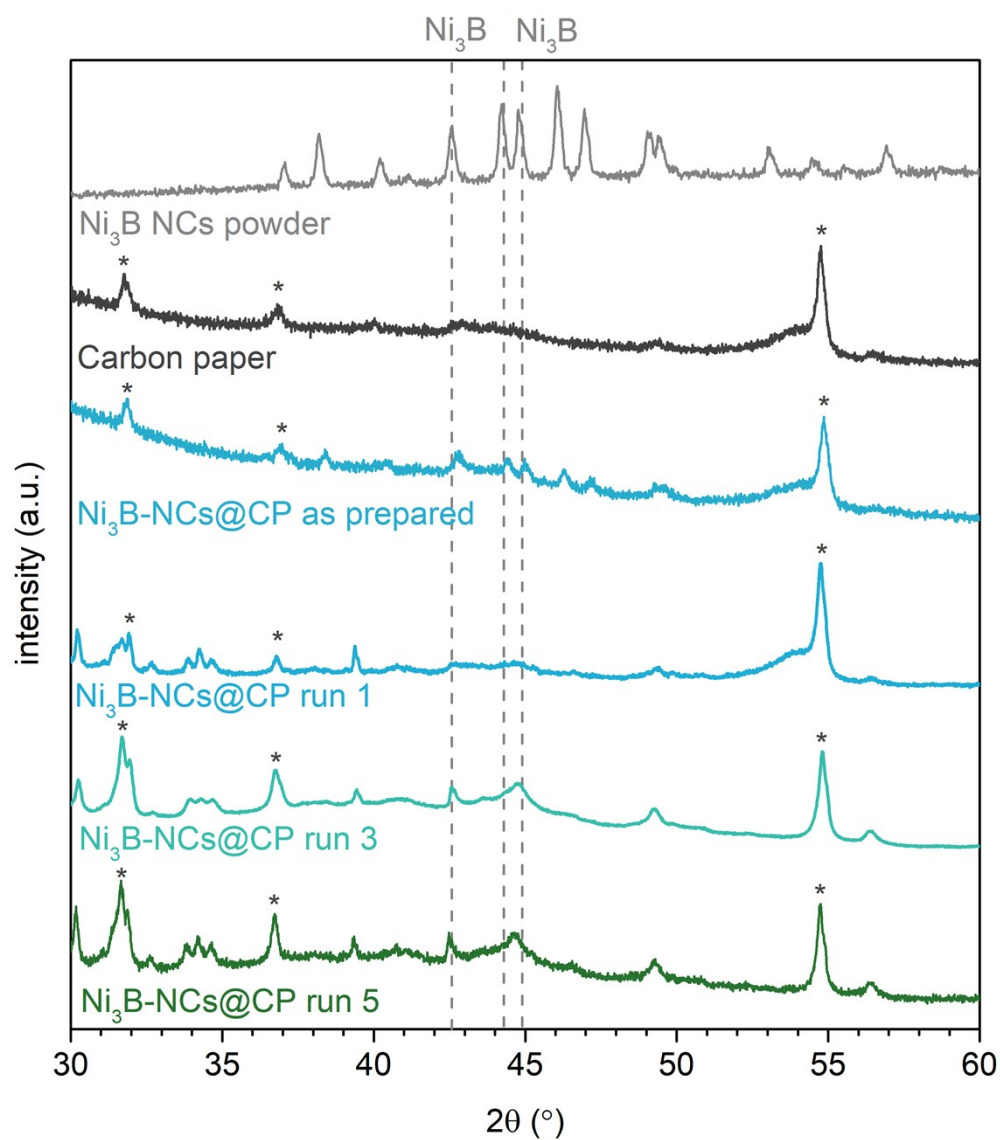

Figure S39. XRD patterns of  $\text{Ni}_3\text{B-NCs@CP}$  as prepared, and after the first, third and fifth runs of electrooxidation of 5-HMF at pH 13.9 at 1.8 V vs RHE for 3 hours. XRD of the carbon paper and  $\text{Ni}_3\text{B}$  NCs have also been plotted as references.

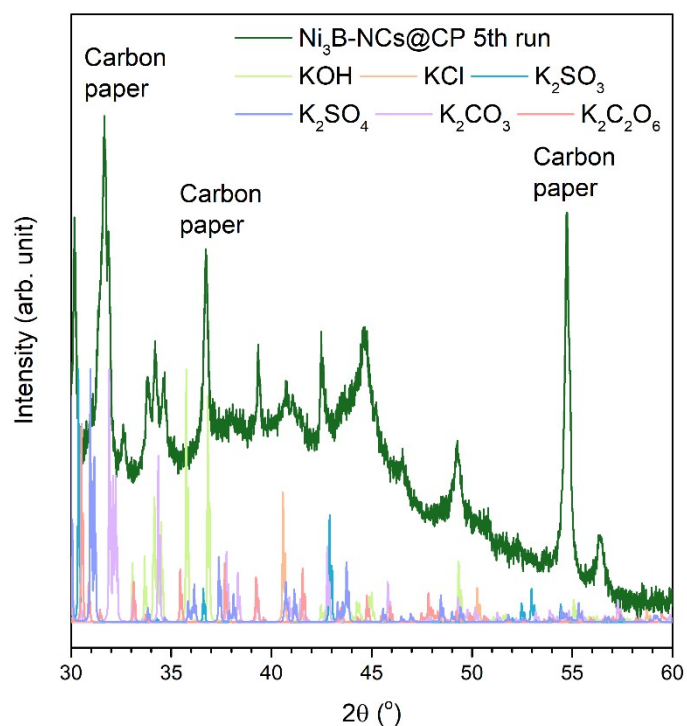

Figure S40. XRD patterns of Ni<sub>3</sub>B-NCs@CP after the fifth run of electrooxidation of 5-HMF at pH 13.9 at 1.8 V vs RHE for 3 h.

The lower angle peaks emerging after the electrochemical tests have been identified as KOH, KCl, K<sub>2</sub>CO<sub>3</sub>, K<sub>2</sub>C<sub>2</sub>O<sub>6</sub>, K<sub>2</sub>SO<sub>3</sub> and K<sub>2</sub>SO<sub>4</sub>. KOH originates from the electrolyte, whereas the other salts may stem from the reaction between K<sup>+</sup> in the electrolyte and other species present as impurities (e.g. Cl<sup>-</sup>, which is present on the Ni<sub>3</sub>B surface, as shown by XPS) or generated during the reaction (e.g. carbonate and oxalate anions formed by the oxidative degradation of carbon paper; sulphates and sulphites coming from Nafion).



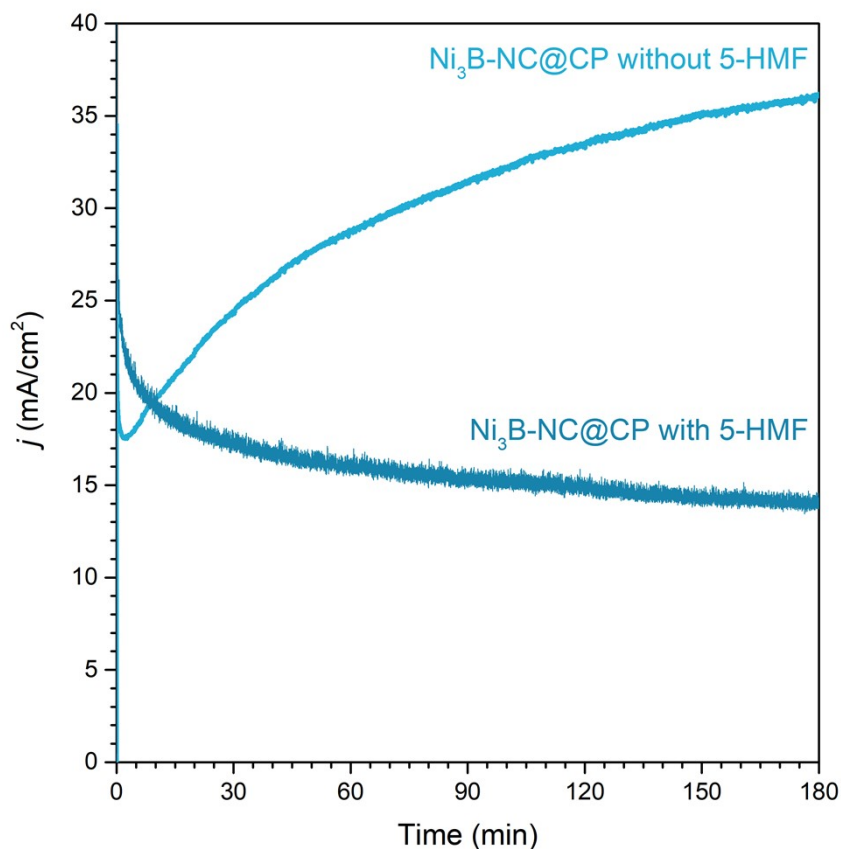

Figure S41. Chronoamperometry of Ni<sub>3</sub>B-NCs@CP with catalyst loading 0.05 mg/cm<sup>2</sup> in 1 M KOH (pH 13.9) at 1.8 V vs RHE with 100 mM of 5-HMF and no 5-HMF.

The fact that the chronoamperometry of Ni<sub>3</sub>B-NCs@CP at 1.8 V vs RHE in the absence of 5-HMF and at pH 13.9 shows a trend of increasing current density suggests that besides the OER, under these conditions significant oxidation of the electrode is taking place, most likely as a consequence of gradual oxidative degradation of the carbon paper support. It is worth noting that this phenomenon seems to be largely suppressed in the presence of 5-HMF, which can be thus considered to be more prone to undergo oxidation than the carbon paper support.

## References

1. S. Barwe, J. Weidner, S. Cychy, D. M. Morales, S. Dieckhöfer, D. Hiltrop, J. Masa, M. Muhler and W. Schuhmann, *Angew. Chem. Int. Ed.*, 2018, **57**, 11460-11464.
2. P. Zhang, X. Sheng, X. Chen, Z. Fang, J. Jiang, M. Wang, F. Li, L. Fan, Y. Ren, B. Zhang, B. J. J. Timmer, M. S. G. Ahlquist and L. Sun, *Angew. Chem. Int. Ed.*, 2019, **58**, 9155-9159.
3. X. Song, X. Liu, H. Wang, Y. Guo and Y. Wang, *Ind. Eng. Chem. Res.*, 2020, **59**, 17348-17356.
4. C. Wang, Y. Wu, A. Bodach, M. L. Krebs, W. Schuhmann and F. Schüth, *Angew. Chem. Int. Ed.*, 2023, **62**, e202215804.
5. G. Grabowski, J. Lewkowski and R. Skowroński, *Electrochim. Acta*, 1991, **36**, 1995.
6. B. You, X. Liu, N. Jiang and Y. Sun, *J. Am. Chem. Soc.*, 2016, **138**, 13639-13646.
7. B. You, N. Jiang, X. Liu and Y. Sun, *Angew. Chem., Int. Ed. Engl.*, 2016, **55**, 9913-9917.
8. B. You, X. Liu, X. Liu and Y. Sun, *ACS Catal.*, 2017, **7**, 4564-4570.
9. M. Li, L. Chen, S. Ye, G. Fan, L. Yang, X. Zhang and F. Li, *J. Mater. Chem. A*, 2019, **7**, 13695-13704.
10. A. R. Poerwoprajitno, L. Gloag, J. Watt, S. Cychy, S. Cheong, P. V. Kumar, T. M. Benedetti, C. Deng, K.-H. Wu, C. E. Marjo, D. L. Huber, M. Muhler, J. J. Gooding, W. Schuhmann, D.-W. Wang and R. D. Tilley, *Angew. Chem. Int. Ed.*, 2020, **59**, 15487-15491.
11. N. Zhang, Y. Zou, L. Tao, W. Chen, L. Zhou, Z. Liu, B. Zhou, G. Huang, H. Lin and S. Wang, *Angew. Chem. Int. Ed.*, 2019, **58**, 15895-15903.
12. Y. Lu, C.-L. Dong, Y.-C. Huang, Y. Zou, Y. Liu, Y. Li, N. Zhang, W. Chen, L. Zhou, H. Lin and S. Wang, *Sci. China Chem.*, 2020, **63**, 980-986.
13. X. Chen, X. Zhong, B. Yuan, S. Li, Y. Gu, Q. Zhang, G. Zhuang, X. Li, S. Deng and J.-g. Wang, *Green Chem.*, 2019, **21**, 578-588.
14. X. Deng, M. Li, Y. Fan, L. Wang, X.-Z. Fu and J.-L. Luo, *Appl. Catal. B Environ.*, 2020, **278**, 119339.
15. L. Gao, Z. Liu, J. Ma, L. Zhong, Z. Song, J. Xu, S. Gan, D. Han and L. Niu, *Appl. Catal. B Environ.*, 2020, **261**, 118235.
16. S. Choi, M. Balamurugan, K.-G. Lee, K. H. Cho, S. Park, H. Seo and K. T. Nam, *J. Phys. Chem. Lett.*, 2020, **11**, 2941-2948.
17. N. Heidary and N. Kornienko, *ChemComm*, 2019, **55**, 11996-11999.
18. B. J. Taitt, D.-H. Nam and K.-S. Choi, *ACS Catal.*, 2019, **9**, 660-670.
19. M. Cai, Y. Zhang, Y. Zhao, Q. Liu, Y. Li and G. Li, *J. Mater. Chem. A*, 2020, **8**, 20386-20392.
20. W. Chen, C. Xie, Y. Wang, Y. Zou, C.-L. Dong, Y.-C. Huang, Z. Xiao, Z. Wei, S. Du, C. Chen, B. Zhou, J. Ma and S. Wang, *Chem*, 2020, **6**, 2974-2993.
21. K. Zhang, Z. Zhan, M. Zhu, H. Lai, X. He, W. Deng, Q. Zhang and Y. Wang, *J. Energy Chem.*, 2023, **80**, 58-67.
22. W.-J. Liu, L. Dang, Z. Xu, H.-Q. Yu, S. Jin and G. W. Huber, *ACS Catal.*, 2018, **8**, 5533-5541.
23. S. Yang, Y. Guo, P. Zhao, H. Jiang, H. Shen, Z. Chen, L. Jiang, X. Xue, Q. Zhang and H. Zhang, *ACS Catal.*, 2024, **14**, 449-462.
24. X. Lu, K.-H. Wu, B. Zhang, J. Chen, F. Li, B.-J. Su, P. Yan, J.-M. Chen and W. Qi, *Angew. Chem. Int. Ed.*, 2021, **60**, 14528-14535.
25. M. Zhang, Y. Liu, B. Liu, Z. Chen, H. Xu and K. Yan, *ACS Catal.*, 2020, **10**, 5179-5189.
26. M. J. Kang, H. Park, J. Jegal, S. Y. Hwang, Y. S. Kang and H. G. Cha, *Appl. Catal. B Environ.*, 2019, **242**, 85-91.
27. Y. Zhong, R.-Q. Ren, J.-B. Wang, Y.-Y. Peng, Q. Li and Y.-M. Fan, *Catal. Sci. Technol.*, 2022, **12**, 201-211.
28. Z. Zhao, T. Guo, X. Luo, X. Qin, L. Zheng, L. Yu, Z. Lv, D. Ma and H. Zheng, *Catal. Sci. Technol.*, 2022, **12**, 3817-3825.
29. Y.-F. Qi, K.-Y. Wang, Y. Sun, J. Wang and C. Wang, *ACS Sustain. Chem. Eng.*, 2022, **10**, 645-654.
30. Y. Xie, Z. Zhou, N. Yang and G. Zhao, *Adv. Funct. Mater.*, 2021, **31**, 2102886.

31. L. Gao, X. Wen, S. Liu, D. Qu, Y. Ma, J. Feng, Z. Zhong, H. Guan and L. Niu, *J. Mater. Chem. A*, 2022, **10**, 21135-21141.
32. L. Zheng, Y. Zhao, P. Xu, Z. Lv, X. Shi and H. Zheng, *J. Mater. Chem. A*, 2022, **10**, 10181-10191.
33. R. Ge, Y. Wang, Z. Li, M. Xu, S.-M. Xu, H. Zhou, K. Ji, F. Chen, J. Zhou and H. Duan, *Angew. Chem. Int. Ed.*, 2022, **61**, e202200211.
34. C. Yang, C. Wang, L. Zhou, W. Duan, Y. Song, F. Zhang, Y. Zhen, J. Zhang, W. Bao, Y. Lu, D. Wang and F. Fu, *Chem. Eng. J.*, 2021, **422**, 130125.
35. B. Zhou, Y. Li, Y. Zou, W. Chen, W. Zhou, M. Song, Y. Wu, Y. Lu, J. Liu, Y. Wang and S. Wang, *Angew. Chem. Int. Ed.*, 2021, **60**, 22908-22914.
36. Y. Sun, J. Wang, Y. Qi, W. Li and C. Wang, *Adv. Sci*, 2022, **9**, 2200957.
37. R. Luo, Y. Li, L. Xing, N. Wang, R. Zhong, Z. Qian, C. Du, G. Yin, Y. Wang and L. Du, *Appl. Catal. B Environ.*, 2022, **311**, 121357.
38. M. Zhou, J. Chen and Y. Li, *Catal. Sci. Technol.*, 2022, **12**, 4288-4297.
39. B. Zhang, H. Fu and T. Mu, *Green Chem.*, 2022, **24**, 877-884.
40. G. Yang, Y. Jiao, H. Yan, Y. Xie, C. Tian, A. Wu, Y. Wang and H. Fu, *Nat. Commun.*, 2022, **13**, 3125.
41. S. Yang, Y. Guo, Y. Zhao, L. Zhang, H. Shen, J. Wang, J. Li, C. Wu, W. Wang, Y. Cao, S. Zhuo, Q. Zhang and H. Zhang, *Small*, 2022, **18**, 2201306.
